# Supplementary material
Source: Research Square preprint supplement (doi:10.21203/rs.3.rs-9577073/v1)
Supplement: Supplementary file 1 [file a4cfd7aad4108b56c89bdca0.pdf]

Supplementary Information for  
Bridging the green hydrogen gap: The role of H2Global in cross-continental  
hydrogen, ammonia and methanol markets

Alexander Meisinger<sup>a</sup>, Lukas Jansen<sup>b</sup>, Leon Schumm<sup>a</sup>, Anton Achhammer<sup>a</sup>, Michael Sterner<sup>a</sup>

<sup>a</sup>*Institute for Energy Networks and Energy Storage, University of Applied Sciences (OTH) Regensburg, Seybothstraße 2, Regensburg, 93053, Germany*

<sup>b</sup>*Fraunhofer IEE, Fraunhofer Institute of Energy Economics and Energy System Technology, Joseph-Beuys-Str. 8, 34117 Kassel, Germany*

---

---

**Supplementary Items List**

|                                                                                             |           |
|---------------------------------------------------------------------------------------------|-----------|
| <b>Supplementary Methodology: System Overview</b>                                           | <b>3</b>  |
| <b>Supplementary Results 1: European energy system and varying import costs</b>             | <b>5</b>  |
| <b>Supplementary Results 2: African energy systems and varying export volumes</b>           | <b>9</b>  |
| <b>Supplementary Results 3: European-African energy exchange and the H2Global mechanism</b> | <b>27</b> |
| <b>Supplementary References</b>                                                             | <b>33</b> |





**Supplementary Results: European energy system and varying import costs – GreenDeal scenario, Supply structure, 7% WACC**

**a) Hydrogen**

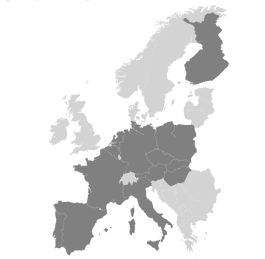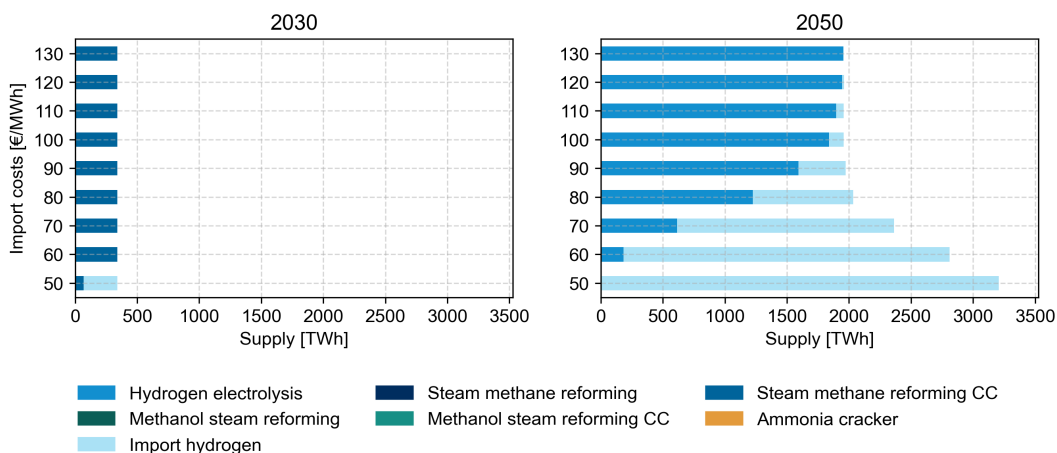

**b) Ammonia**

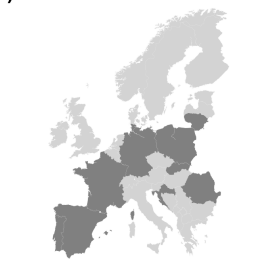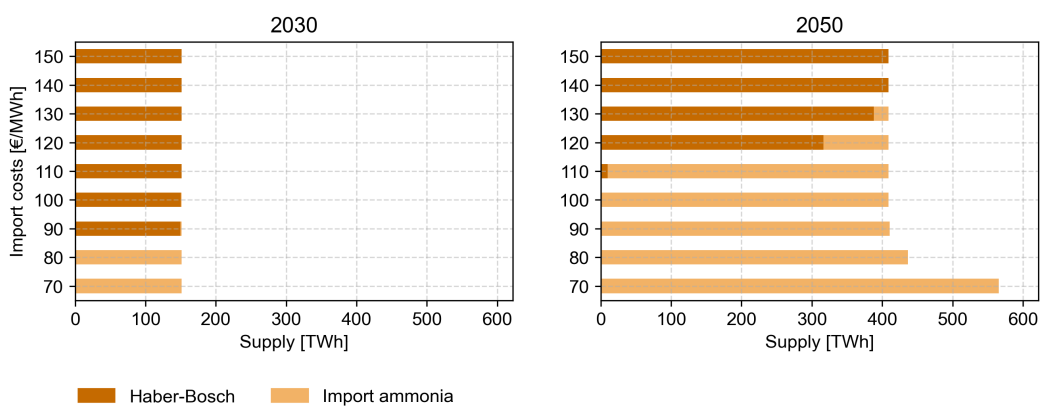

**c) Methanol**

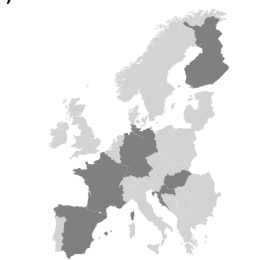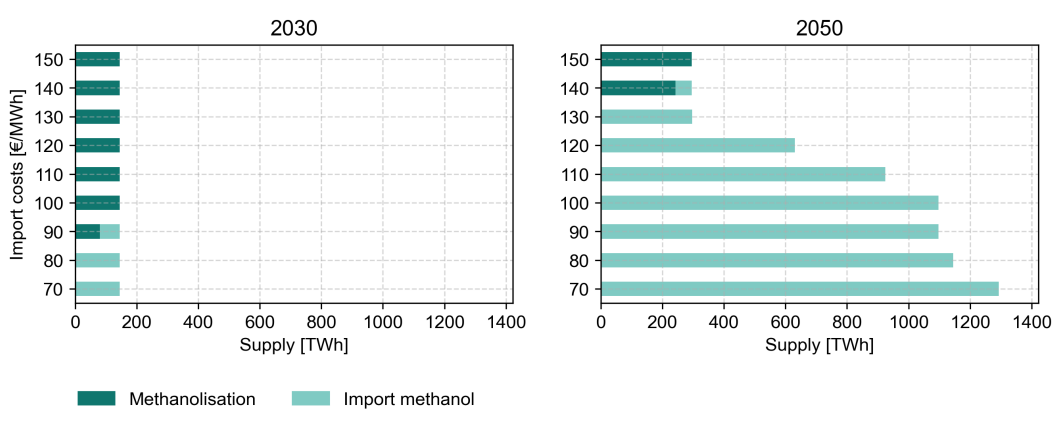

Supplementary Figure 3: Impact of import costs on domestic production of hydrogen, ammonia, and methanol in Europe. Domestic production by technology and imports are shown for varying import costs in 2030 and 2050 under the GreenDeal scenario, assuming a weighted average cost of capital (WACC) of 7%. Import costs range from 50-150 €/MWh, depending on the energy carrier, with a resolution of 10 €/MWh. Maps show the current production locations in Europe in 2024<sup>3</sup>.

**Supplementary Results: European energy system and varying import costs – GreenDeal scenario, Demand structure, 7% WACC**

**a) Hydrogen**

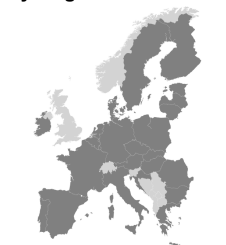

■ Demand location 2024  
 ■ No demand / no data

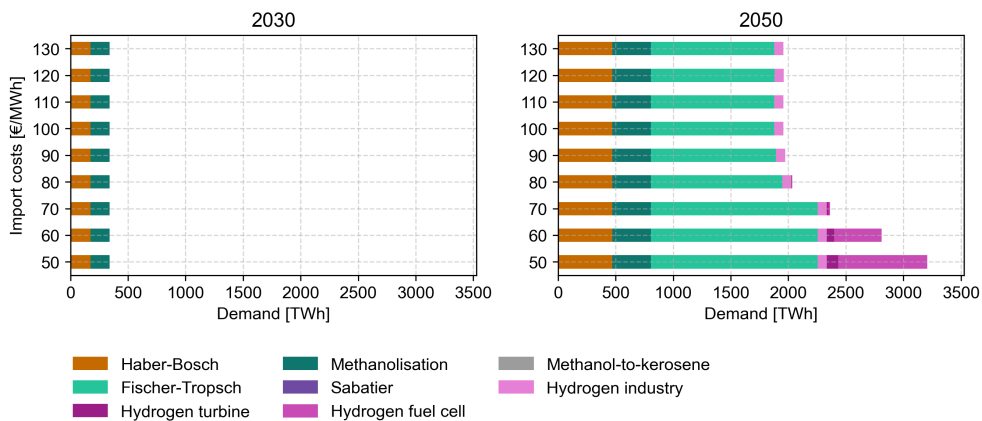

**b) Ammonia**

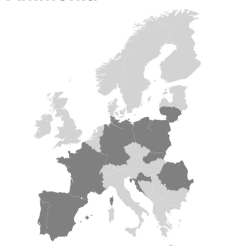

■ Demand location 2024  
 ■ No demand / no data

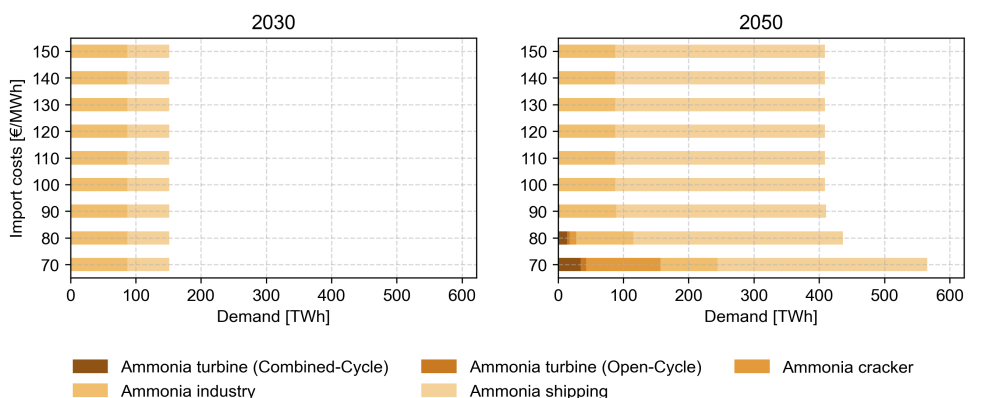

**c) Methanol**

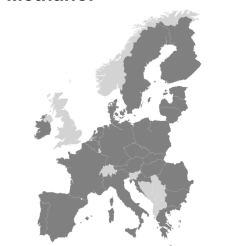

■ Demand location 2024  
 ■ No demand / no data

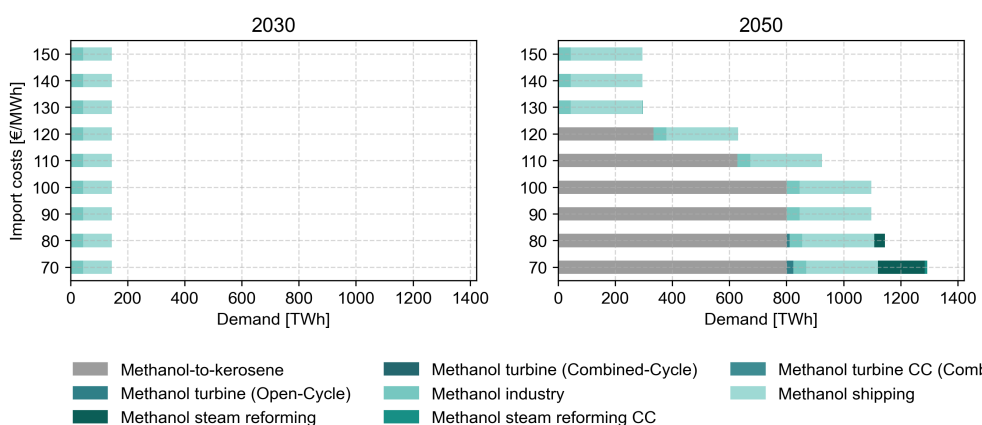

Supplementary Figure 4: Impact of import costs on domestic demand of hydrogen, ammonia, and methanol in Europe. Domestic demand by technology are shown for varying import costs in 2030 and 2050 under the GreenDeal scenario, assuming a weighted average cost of capital (WACC) of 7%. Import costs range from 50-150 €/MWh, depending on the energy carrier, with a resolution of 10 €/MWh. Maps show the current demand locations in Europe in 2024<sup>3,4</sup>.

**Supplementary Results: European energy system and varying import costs – Business-as-Usual scenario, Supply structure, 7% WACC**

**a) Hydrogen**

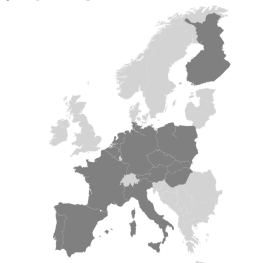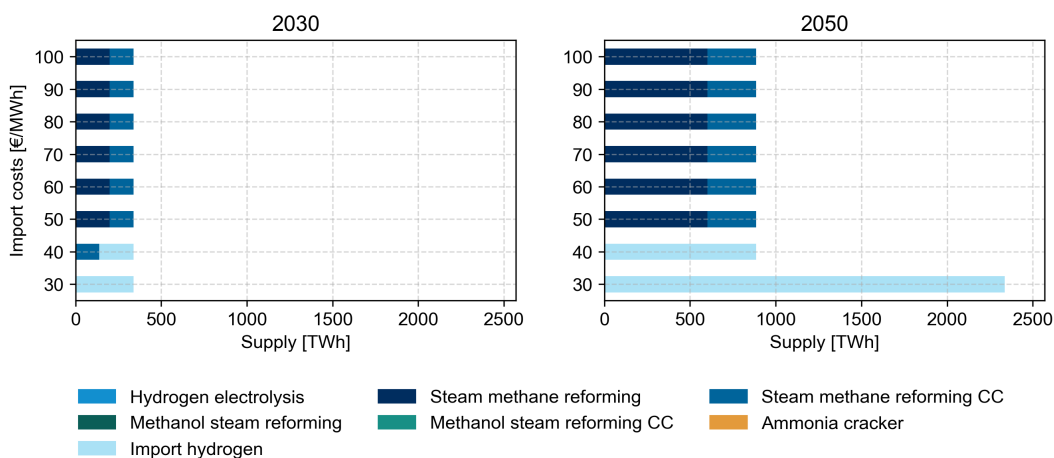

**b) Ammonia**

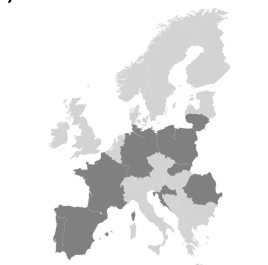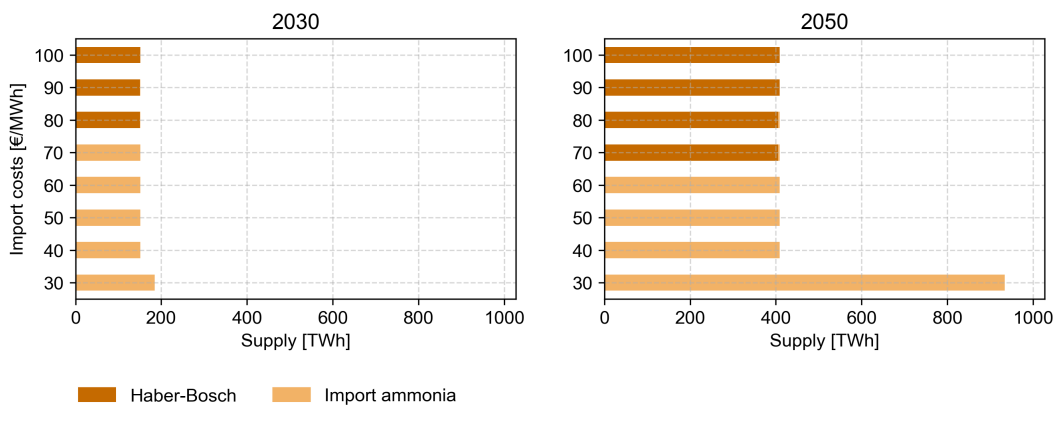

**c) Methanol**

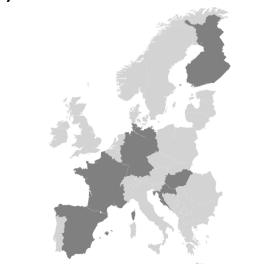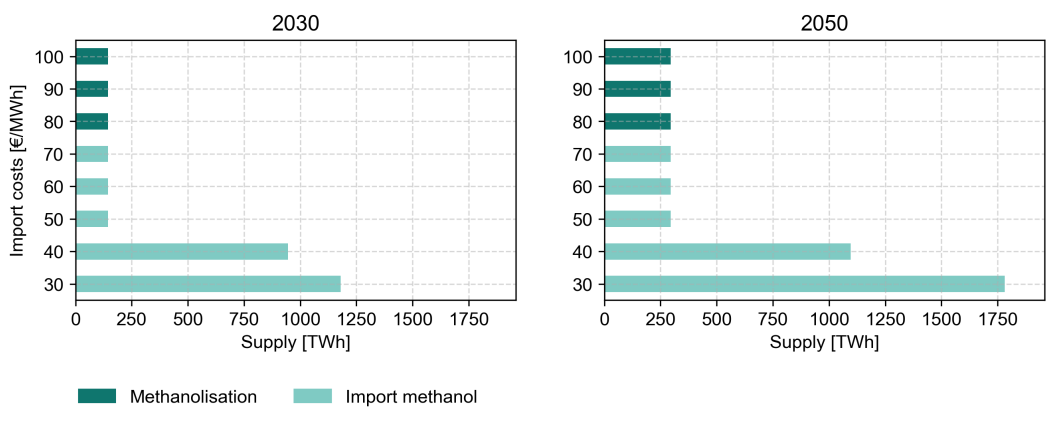

Supplementary Figure 5: Impact of import costs on domestic production of hydrogen, ammonia, and methanol in Europe. Domestic production by technology and imports are shown for varying import costs in 2030 and 2050 under the Business-as-Usual scenario, assuming a weighted average cost of capital (WACC) of 7%. Import costs range from 30-100 €/MWh, depending on the energy carrier, with a resolution of 10 €/MWh. Maps show the current production locations in Europe in 2024<sup>3</sup>.

**Supplementary Results: European energy system and varying import costs – Business-as-Usual scenario, Demand structure, 7% WACC**

**a) Hydrogen**

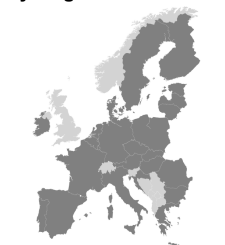

■ Demand location 2024  
 ■ No demand / no data

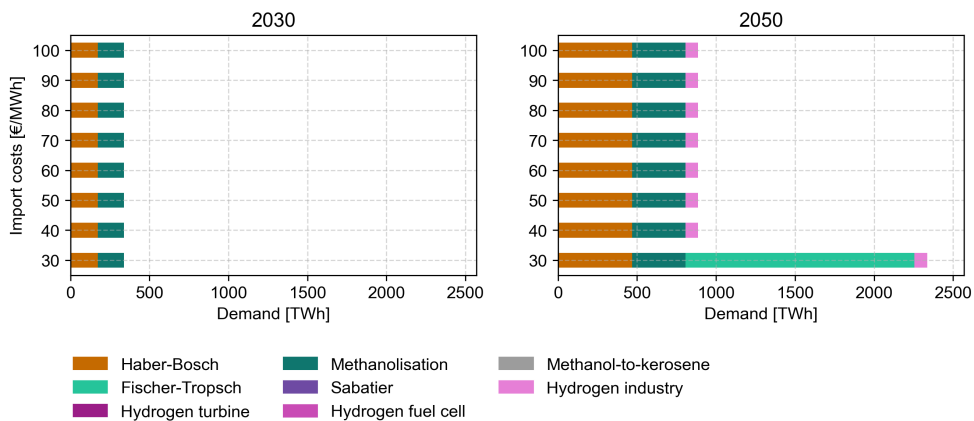

**b) Ammonia**

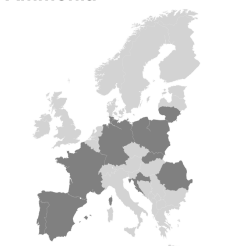

■ Demand location 2024  
 ■ No demand / no data

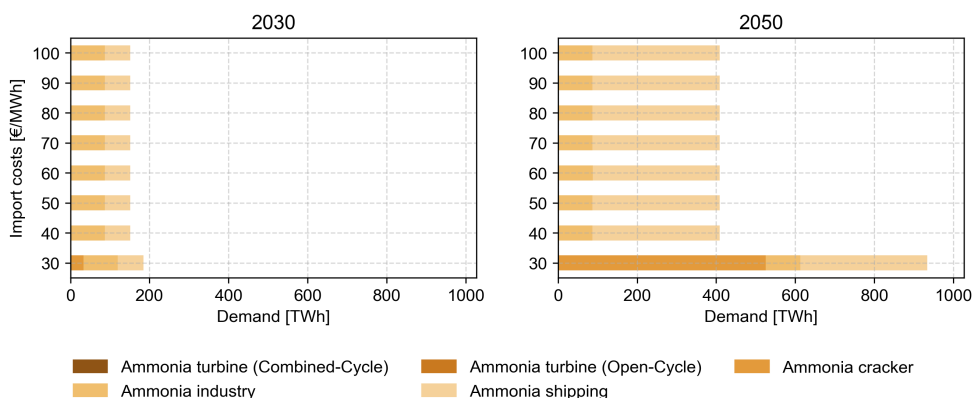

**c) Methanol**

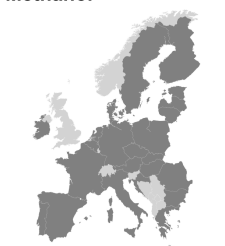

■ Demand location 2024  
 ■ No demand / no data

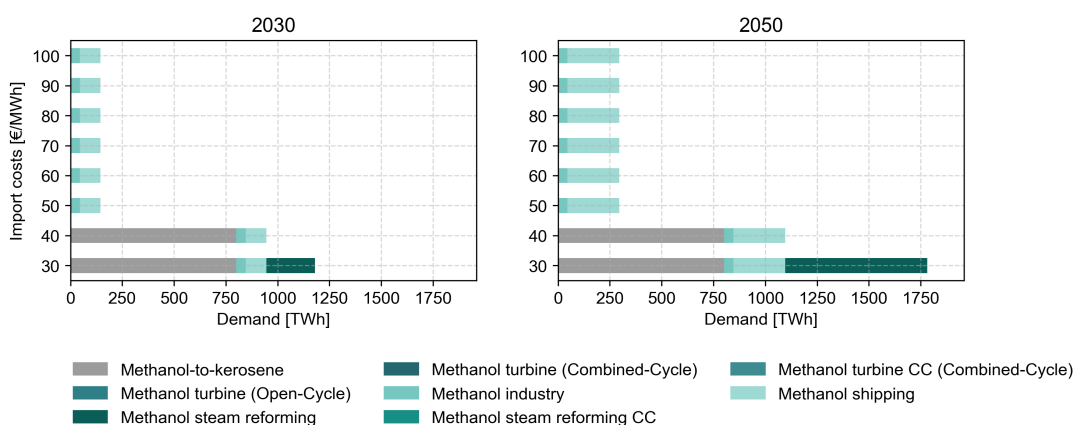

Supplementary Figure 6: Impact of import costs on domestic production of hydrogen, ammonia, and methanol in Europe. Domestic production by technology and imports are shown for varying imports costs in 2030 and 2050 under the GreenDeal scenario, assuming a weighted average cost of capital (WACC) of 7%. Vertical lines indicate total supply in the GreenDeal and Business-as-Usual (BAU) scenarios. Maps show the current production locations in Europe in 2024<sup>3,4</sup>.

**Supplementary Results: African energy systems and varying export volumes – Export-related change in electricity supply, 8% WACC**

**a) Hydrogen export via liquified hydrogen**

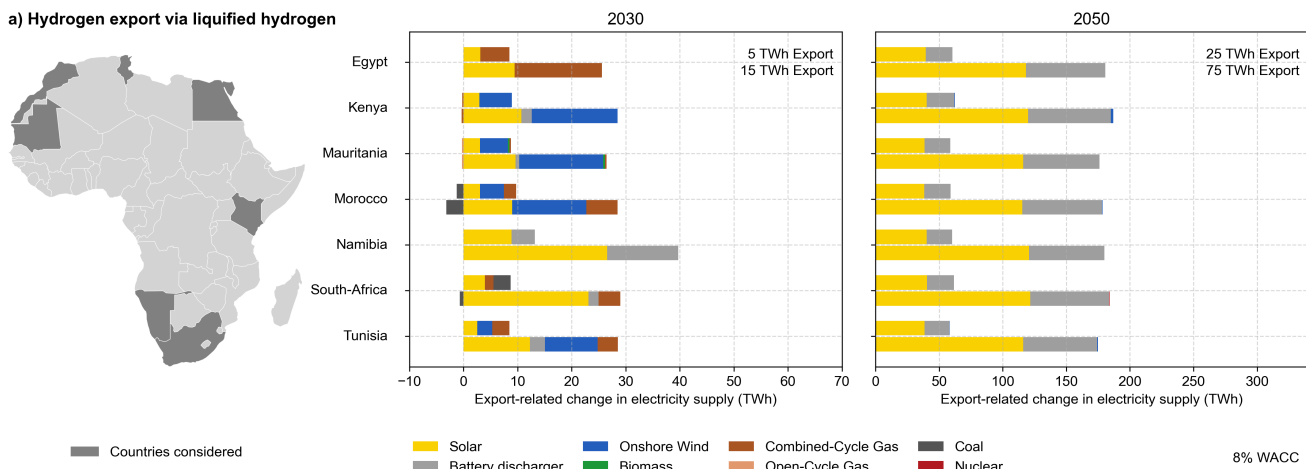

**b) Ammonia export**

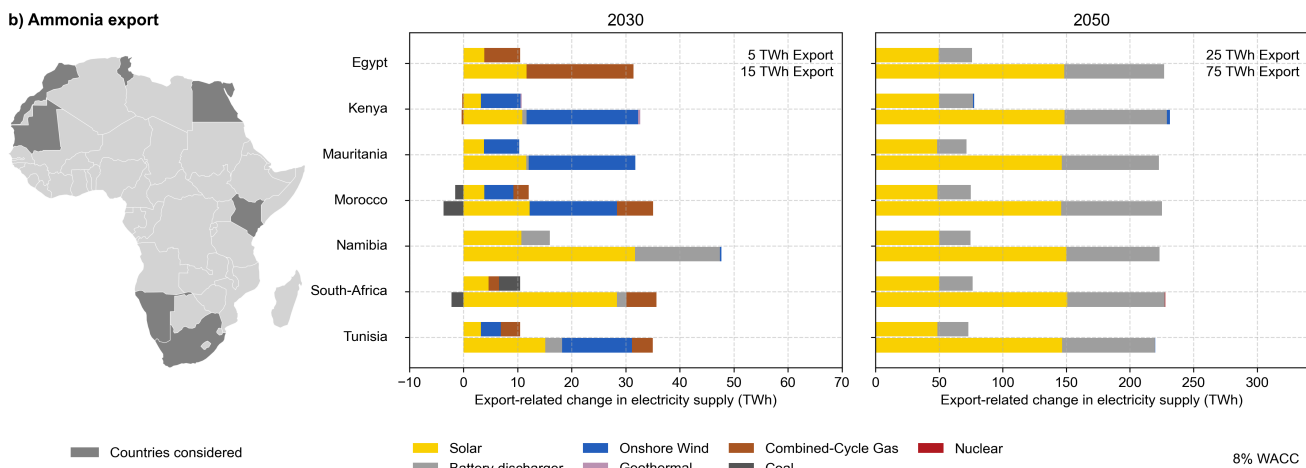

**c) Methanol export**

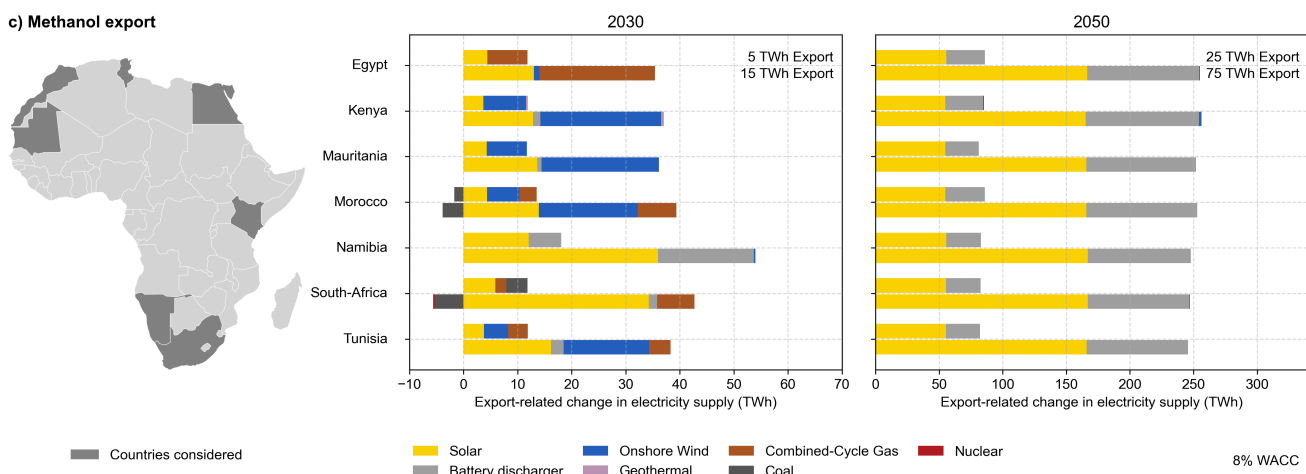

Supplementary Figure 7: Impact of hydrogen, ammonia, and methanol export volumes on domestic electricity supply in selected African countries. Changes in electricity supply by technology are shown for different export volumes in 2030 and 2050, assuming a weighted average cost of capital (WACC) of 8%. Results are reported relative to a non-export scenario. Maps indicate the African countries considered in the analysis.

**a) Hydrogen export via liquified hydrogen**

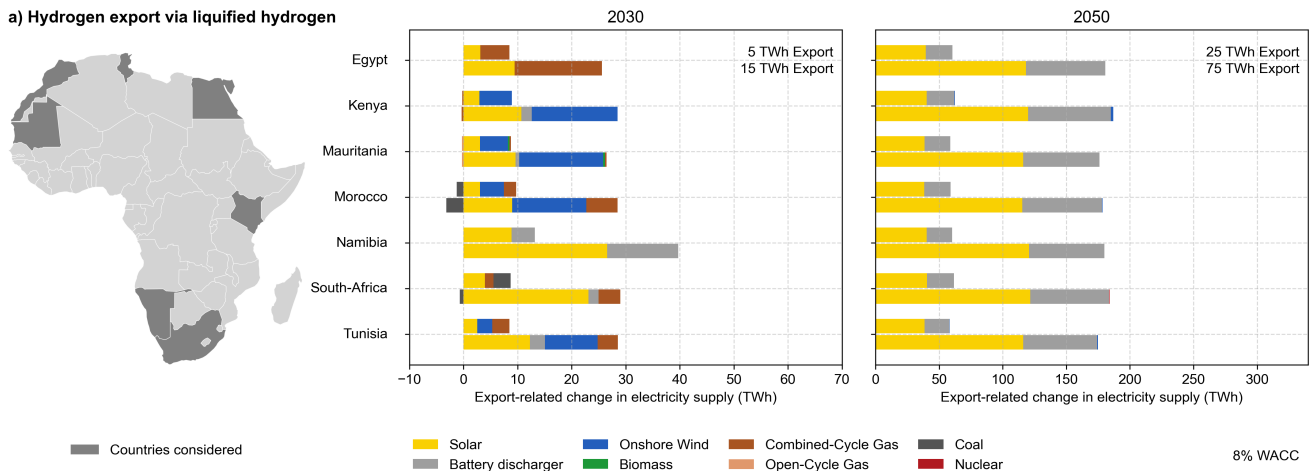

**b) Hydrogen export via ammonia**

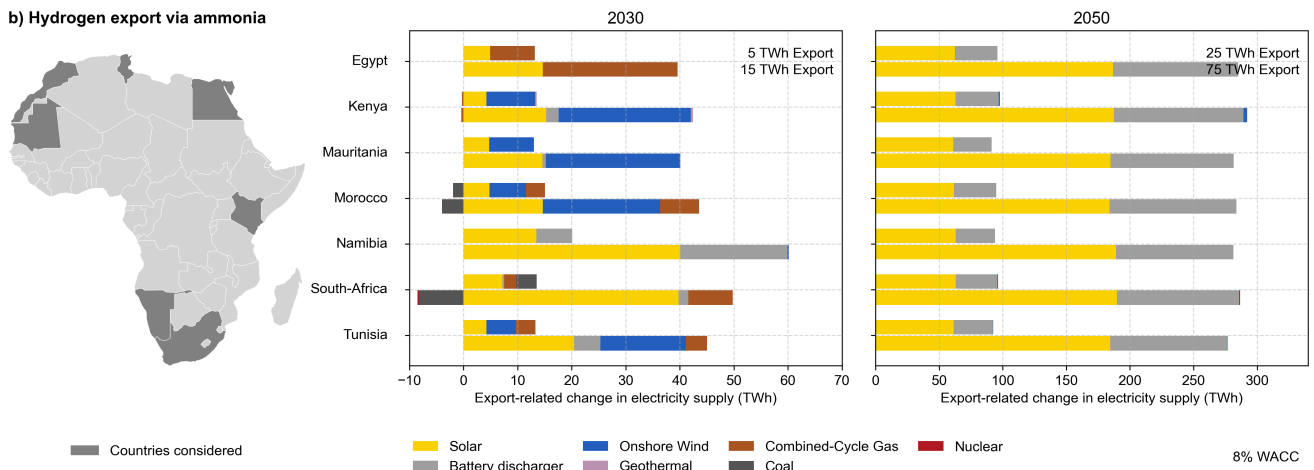

**c) Hydrogen export via methanol**

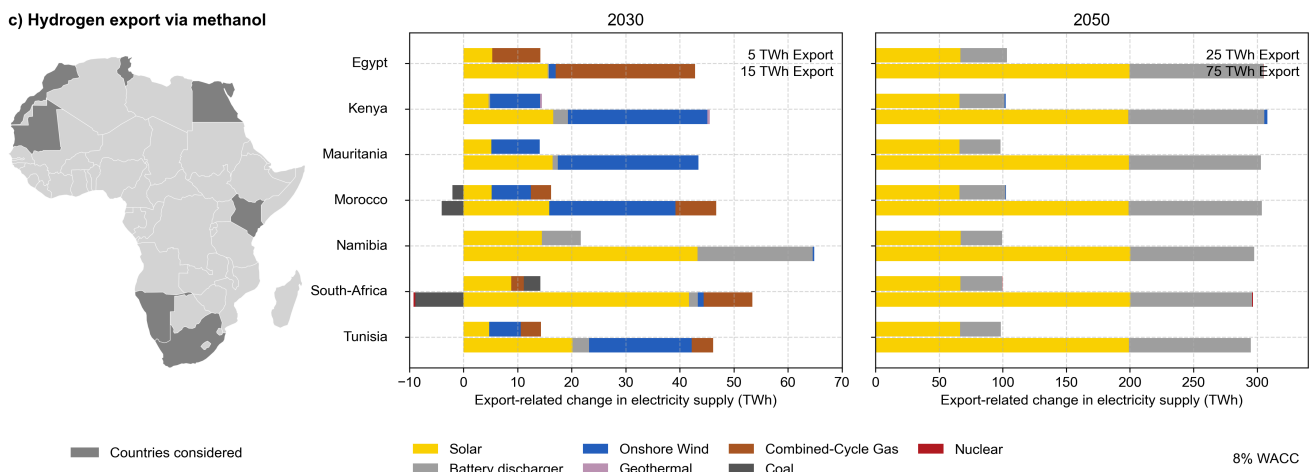

Supplementary Figure 8: Impact of hydrogen export volumes and shipping pathways on domestic electricity supply in selected African countries. Liquefied hydrogen, ammonia and methanol pathways include hydrogen reconversion. Changes in electricity supply by technology are shown for different export volumes in 2030 and 2050, assuming a weighted average cost of capital (WACC) of 8%. Results are reported relative to a non-export scenario. Maps indicate the African countries considered in the analysis.

**Supplementary Results: African energy systems and varying export volumes – Export-related change in electricity supply, 9% WACC**

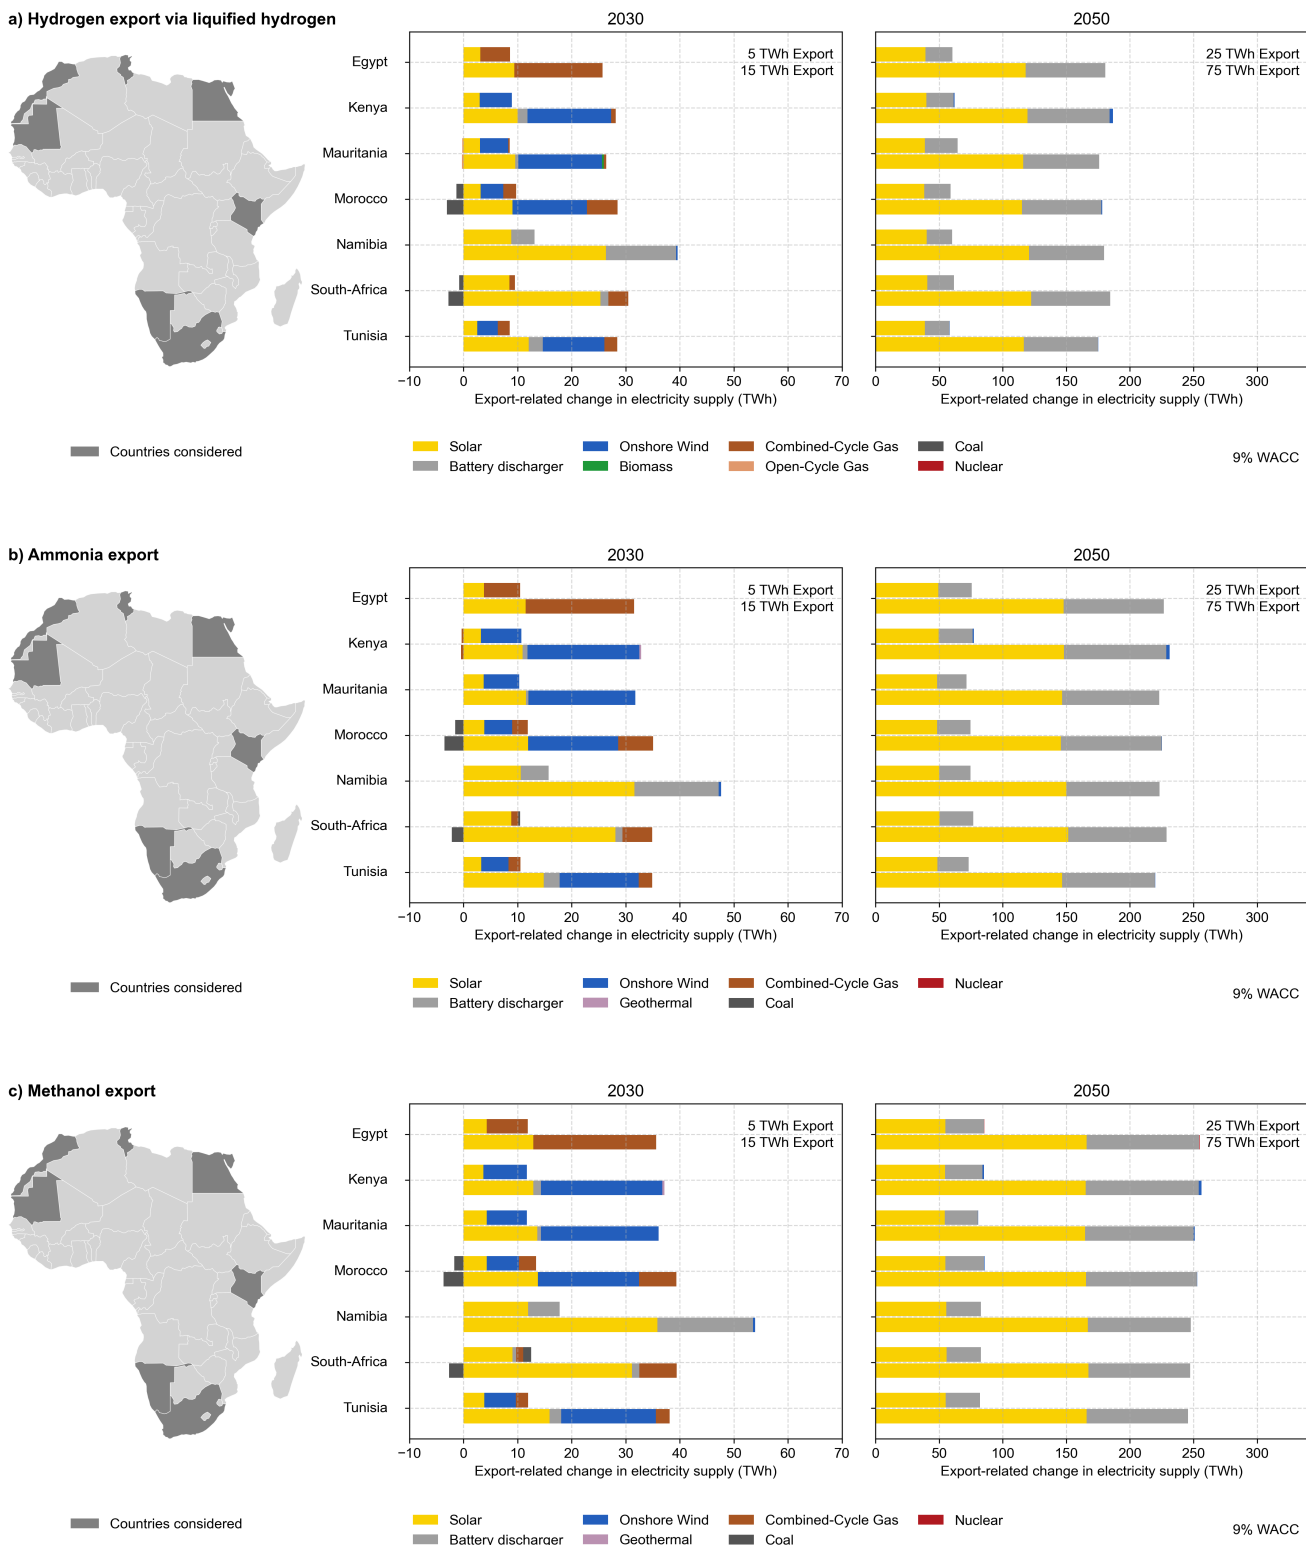

Supplementary Figure 9: Impact of hydrogen, ammonia, and methanol export volumes on domestic electricity supply in selected African countries. Changes in electricity supply by technology are shown for different export volumes in 2030 and 2050, assuming a weighted average cost of capital (WACC) of 9%. Results are reported relative to a non-export scenario. Maps indicate the African countries considered in the analysis.

**a) Hydrogen export via liquified hydrogen**

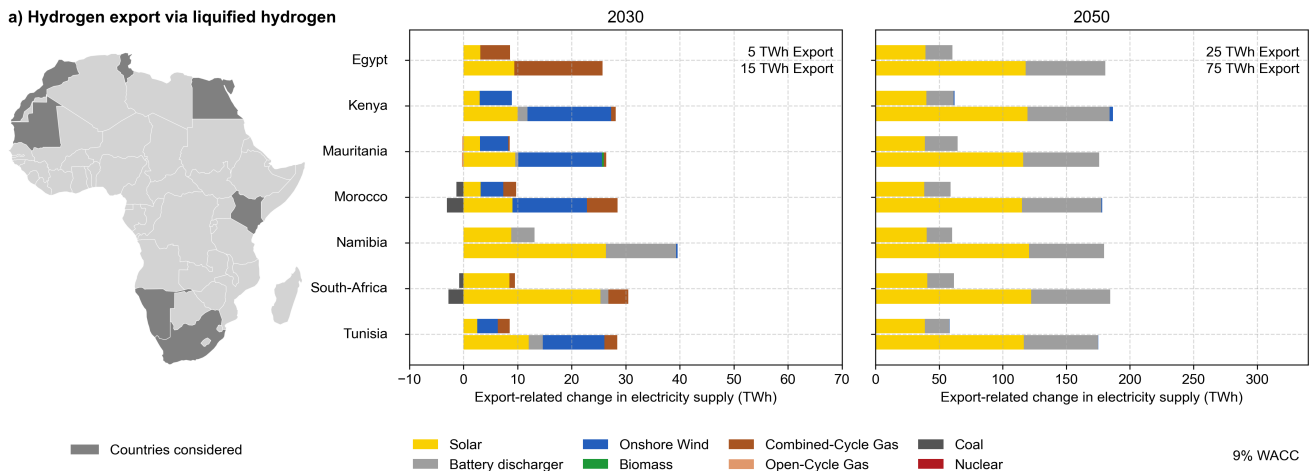

**b) Hydrogen export via ammonia**

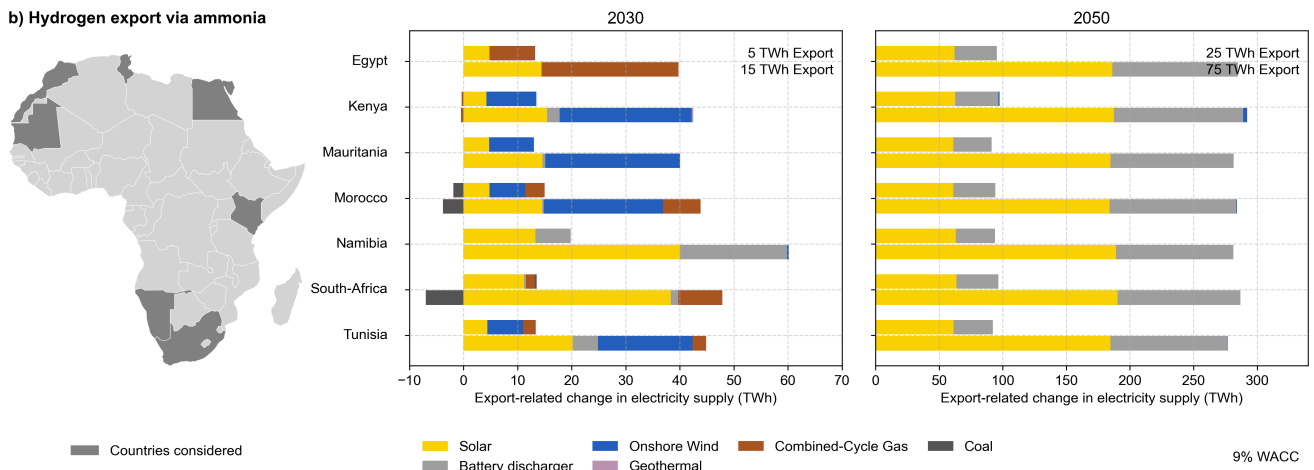

**c) Hydrogen export via methanol**

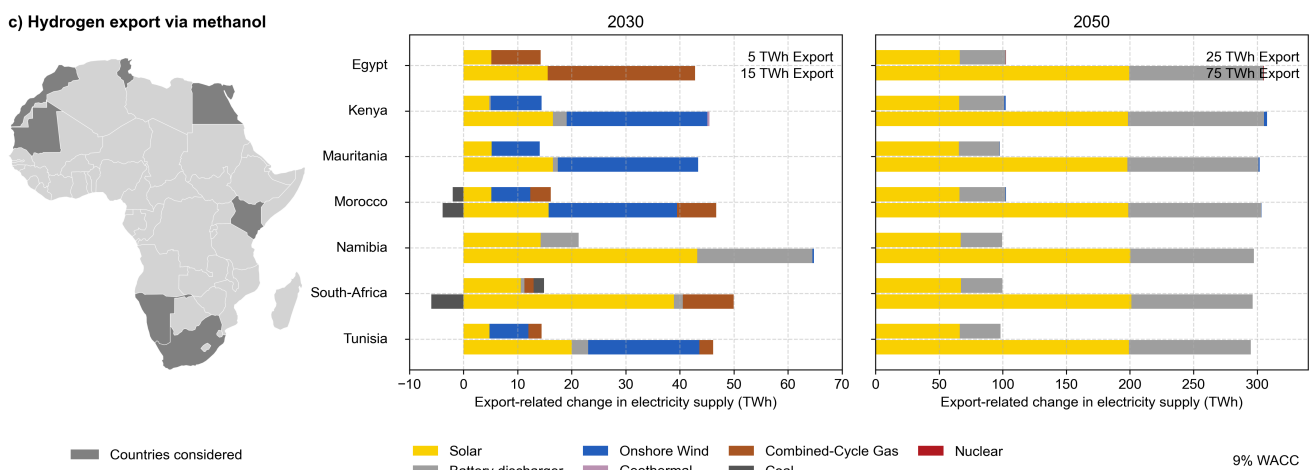

Supplementary Figure 10: Impact of hydrogen export volumes and shipping pathways on domestic electricity supply in selected African countries. Liquefied hydrogen, ammonia and methanol pathways include hydrogen reconversion. Changes in electricity supply by technology are shown for different export volumes in 2030 and 2050, assuming a weighted average cost of capital (WACC) of 9%. Results are reported relative to a non-export scenario. Maps indicate the African countries considered in the analysis.

**Supplementary Results: African energy systems and varying export volumes – Export-related change in electricity supply, 10% WACC**

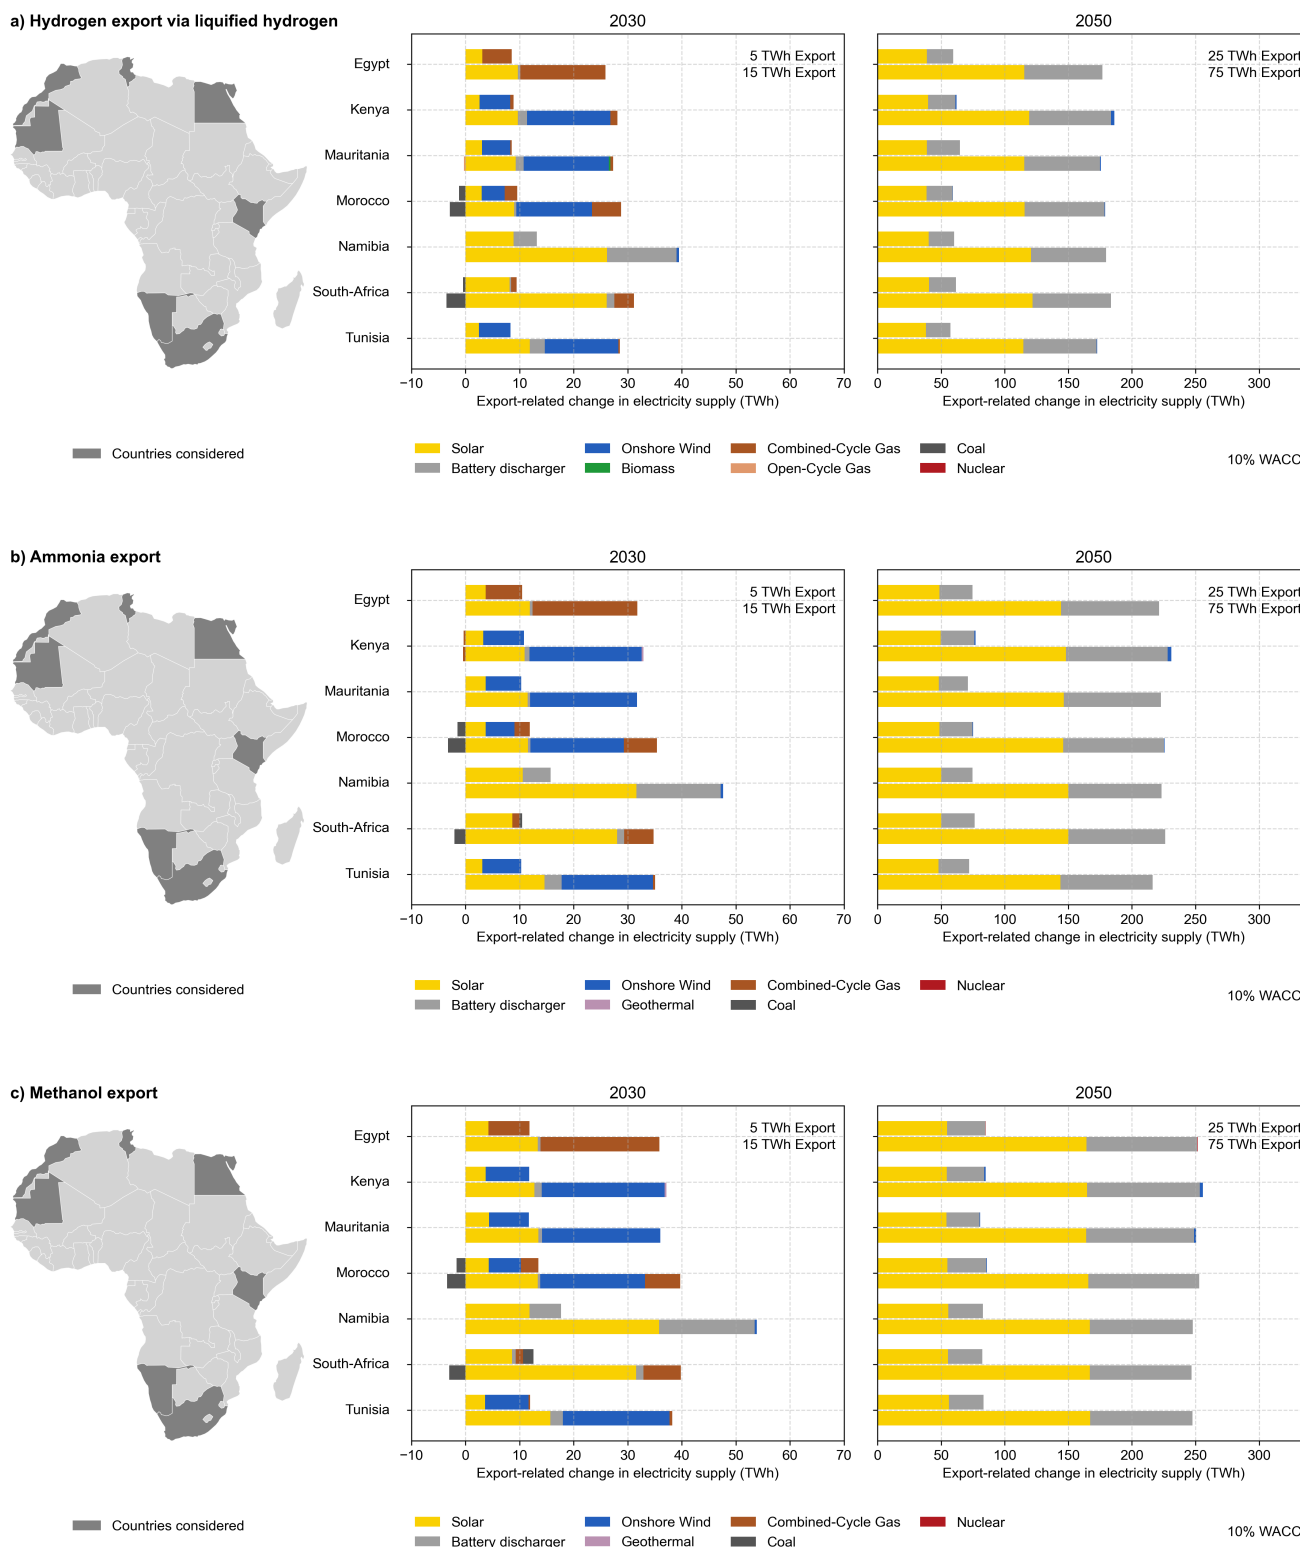

Supplementary Figure 11: Impact of hydrogen, ammonia, and methanol export volumes on domestic electricity supply in selected African countries. Changes in electricity supply by technology are shown for different export volumes in 2030 and 2050, assuming a weighted average cost of capital (WACC) of 10%. Results are reported relative to a non-export scenario. Maps indicate the African countries considered in the analysis.

**a) Hydrogen export via liquified hydrogen**

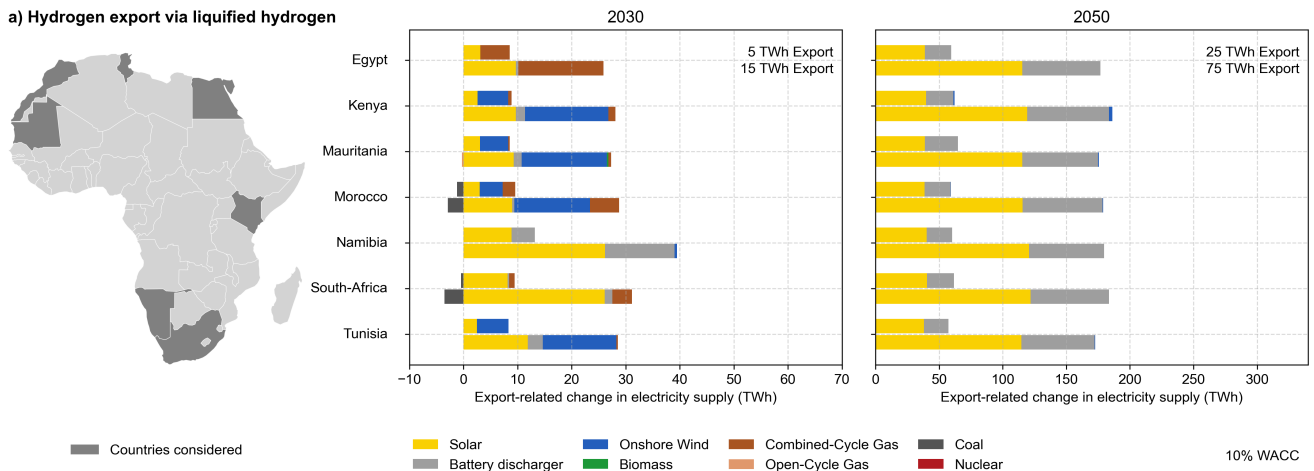

**b) Hydrogen export via ammonia**

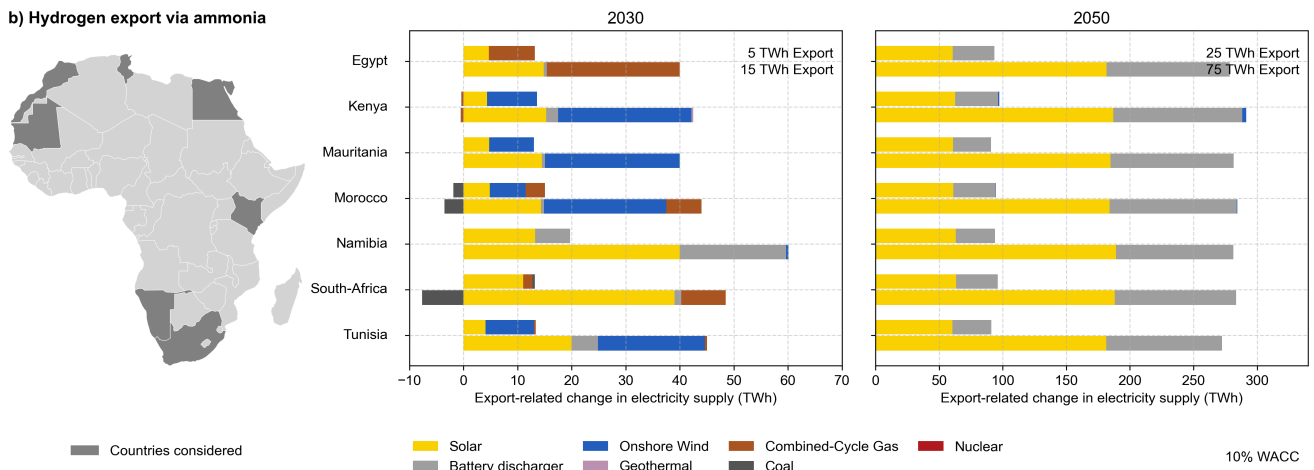

**c) Hydrogen export via methanol**

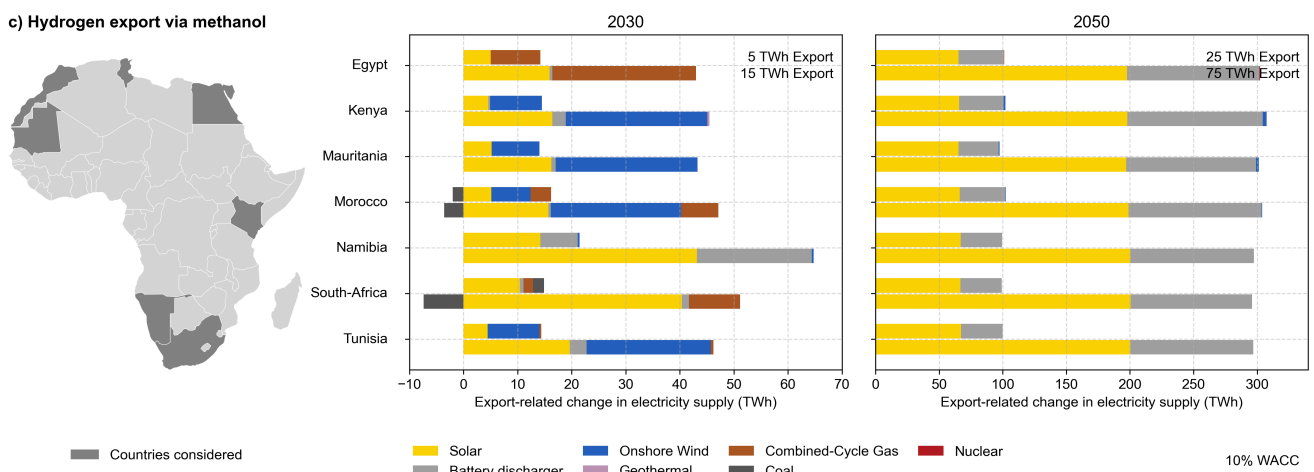

Supplementary Figure 12: Impact of hydrogen export volumes and shipping pathways on domestic electricity supply in selected African countries. Liquefied hydrogen, ammonia and methanol pathways include hydrogen reconversion. Changes in electricity supply by technology are shown for different export volumes in 2030 and 2050, assuming a weighted average cost of capital (WACC) of 10%. Results are reported relative to a non-export scenario. Maps indicate the African countries considered in the analysis.

**Supplementary Results: African energy systems and varying export volumes – Export-related power change, 8% WACC**

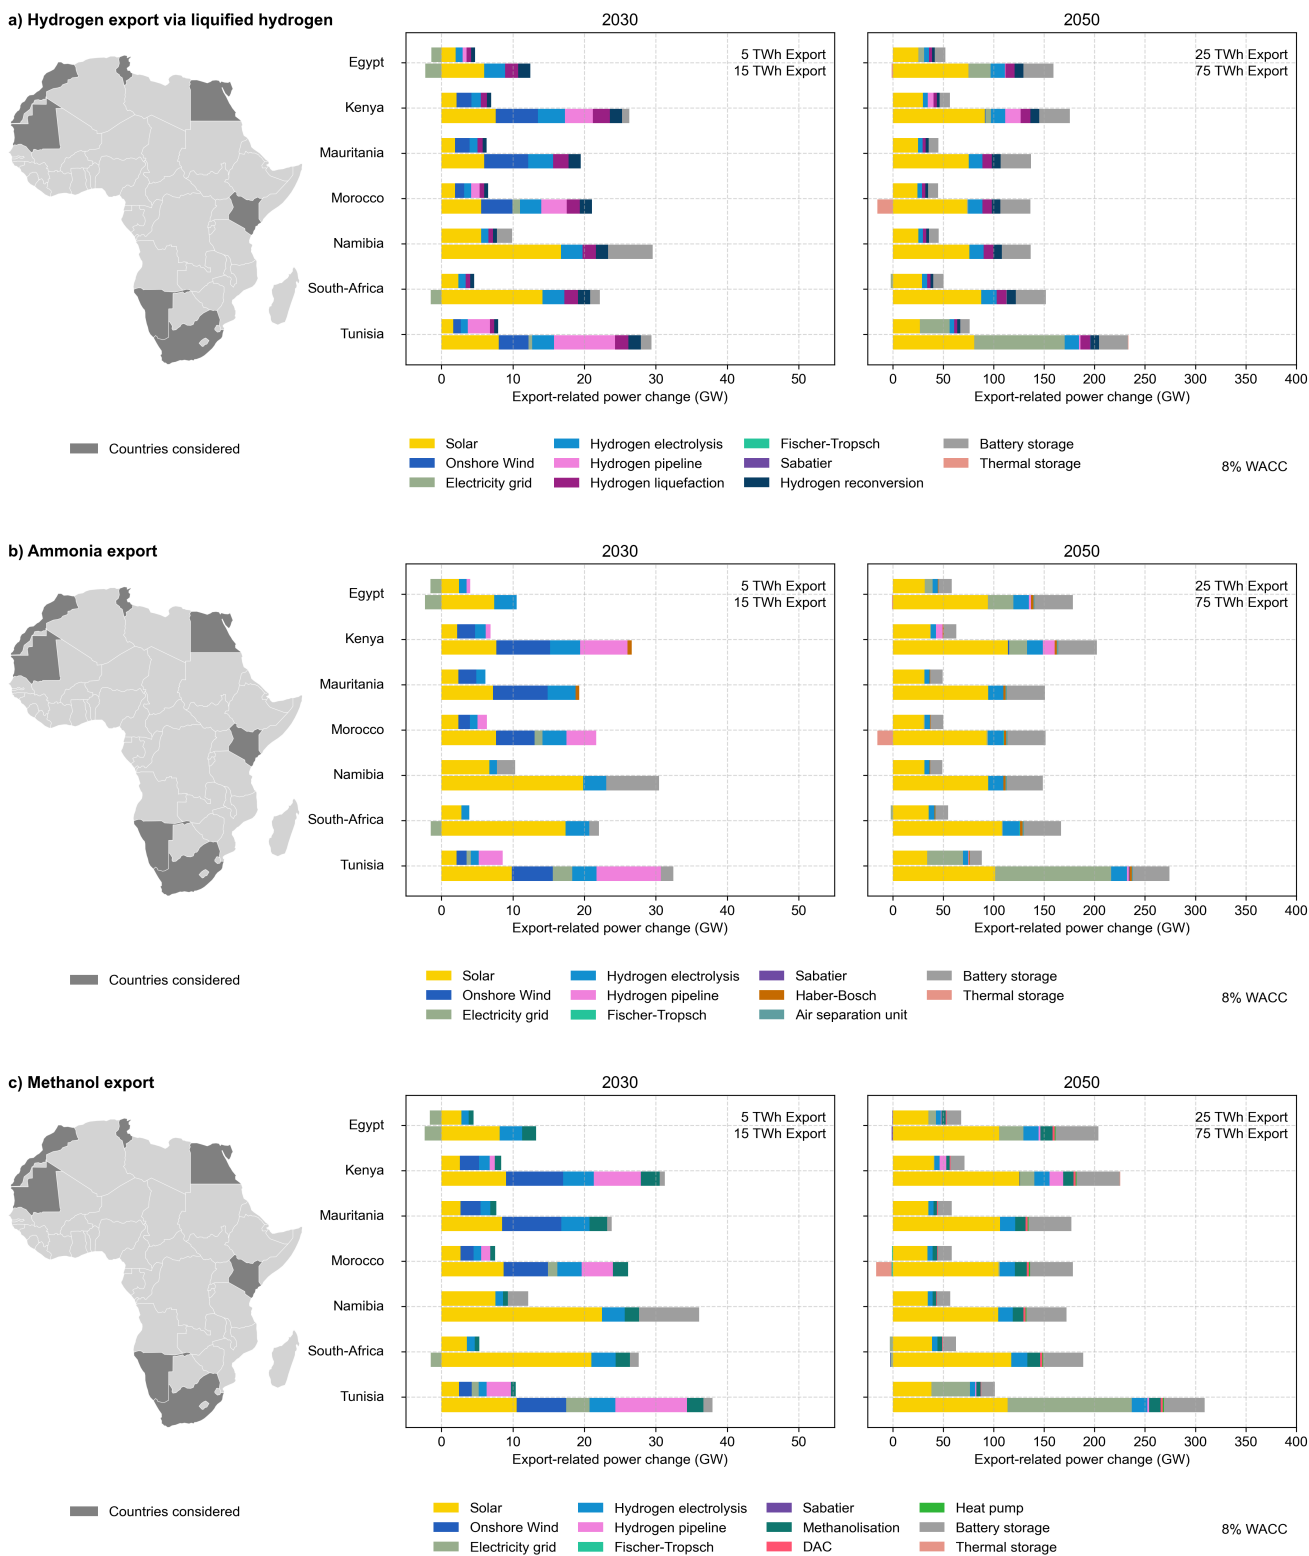

Supplementary Figure 13: Impact of hydrogen, ammonia, and methanol export volumes on domestic power capacity in selected African countries. Changes in power capacity by technology are shown for different export volumes in 2030 and 2050, assuming a weighted average cost of capital (WACC) of 8%. Results are reported relative to a non-export scenario. Maps indicate the African countries considered in the analysis.

**a) Hydrogen export via liquified hydrogen**

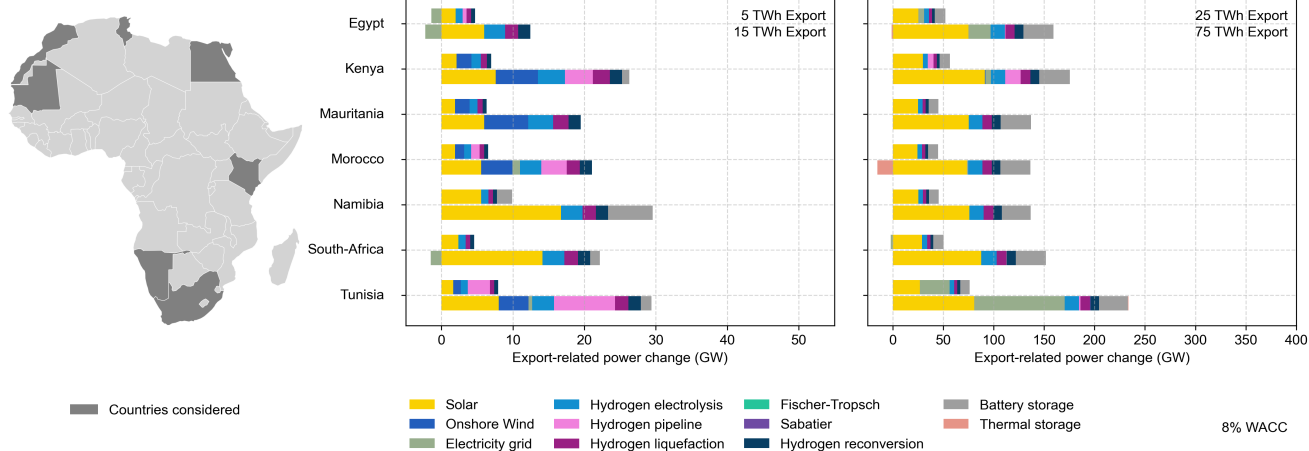

**b) Hydrogen export via ammonia**

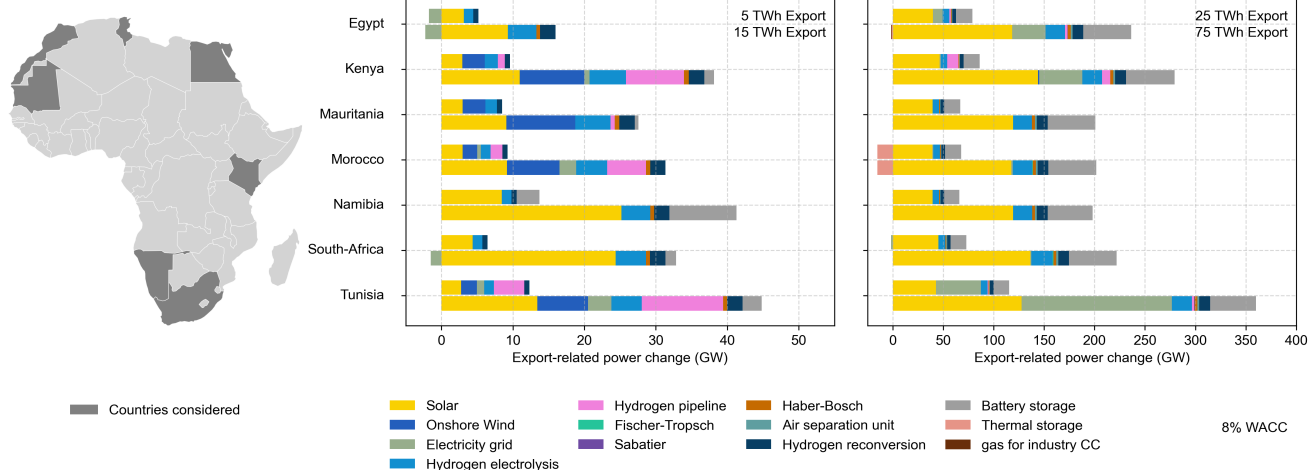

**c) Hydrogen export via methanol**

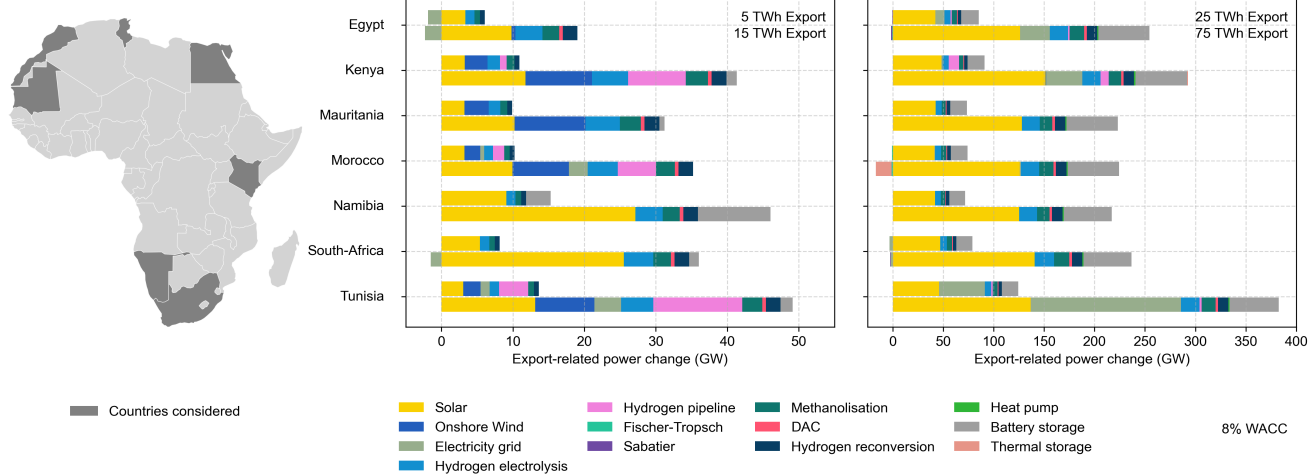

Supplementary Figure 14: Impact of hydrogen export volumes and shipping pathways on domestic power capacity in selected African countries. Liquefied hydrogen, ammonia and methanol pathways include hydrogen reconversion. Changes in power capacity by technology are shown for different export volumes in 2030 and 2050, assuming a weighted average cost of capital (WACC) of 8%. Results are reported relative to a non-export scenario. Maps indicate the African countries considered in the analysis.

**Supplementary Results: African energy systems and varying export volumes – Export-related power change, 9% WACC**

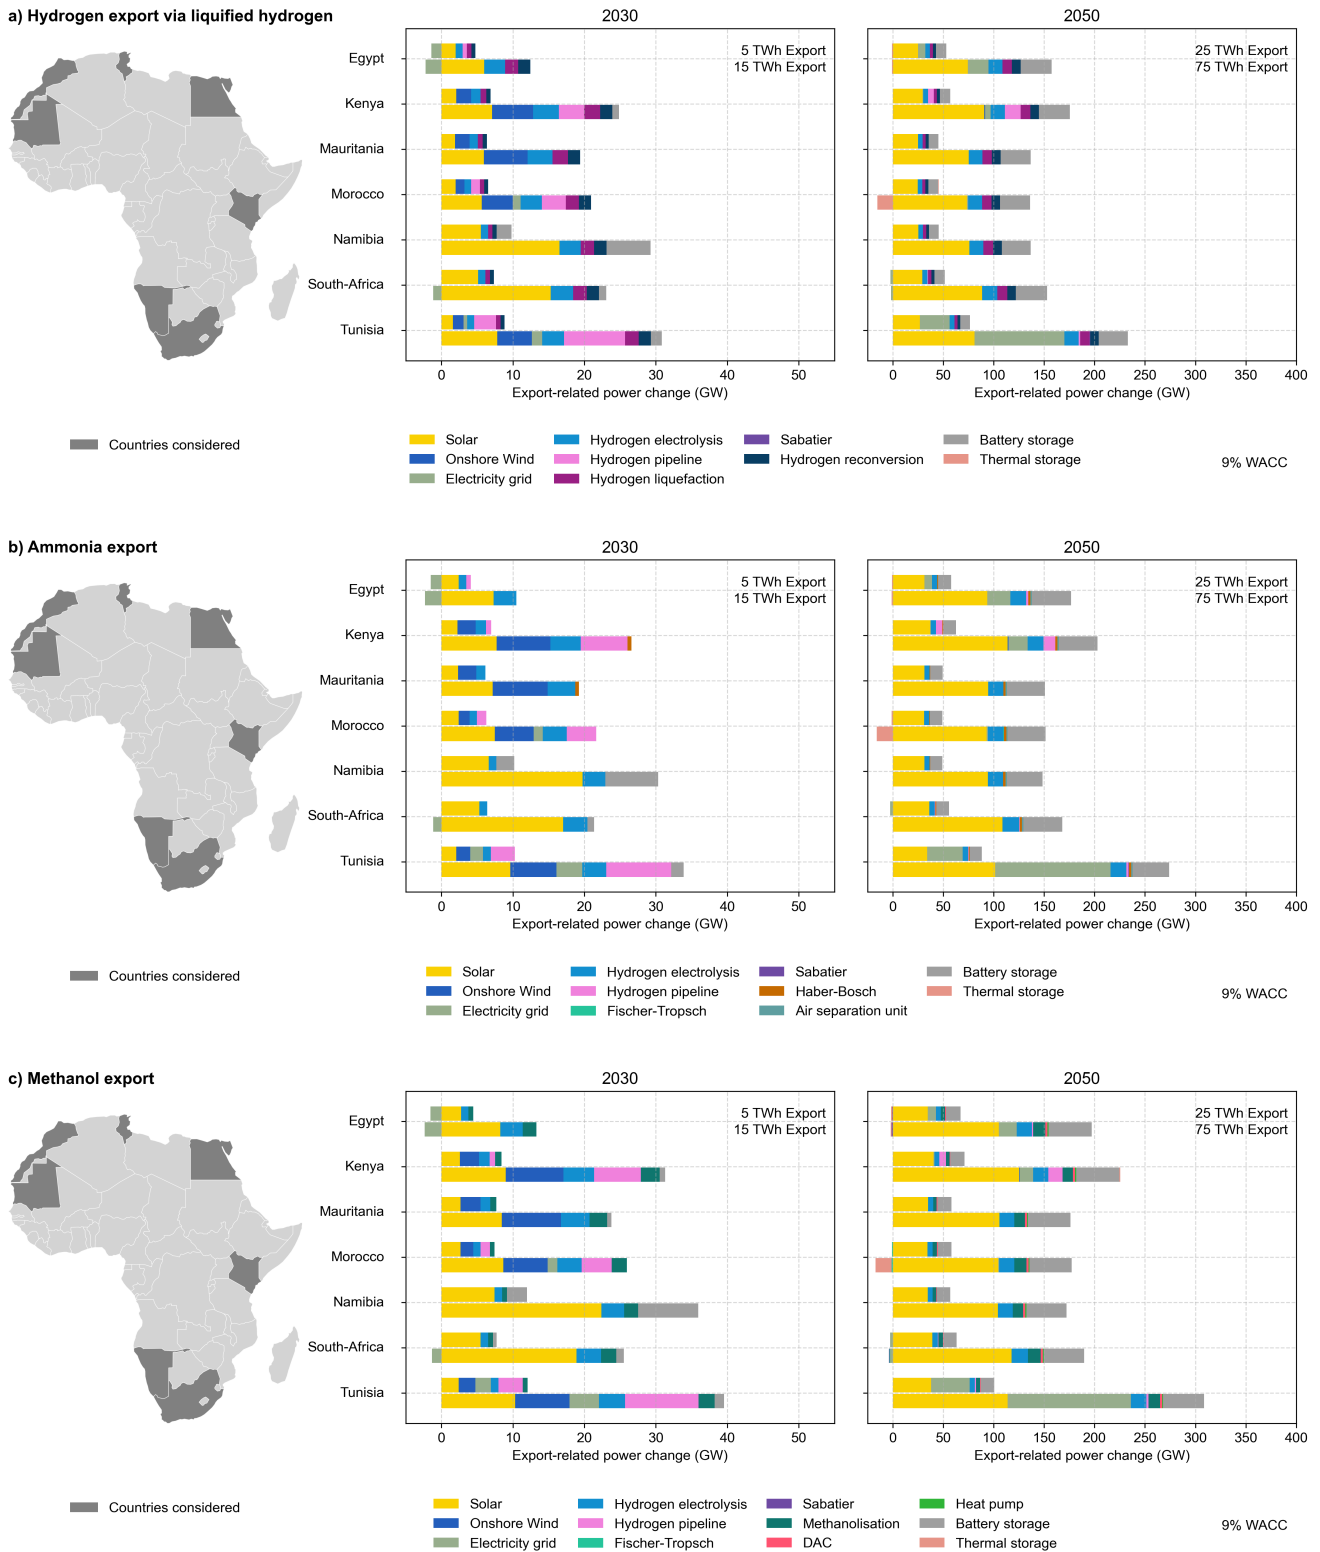

Supplementary Figure 15: Impact of hydrogen, ammonia, and methanol export volumes on domestic power capacity in selected African countries. Changes in power capacity by technology are shown for different export volumes in 2030 and 2050, assuming a weighted average cost of capital (WACC) of 9%. Results are reported relative to a non-export scenario. Maps indicate the African countries considered in the analysis.

**a) Hydrogen export via liquified hydrogen**

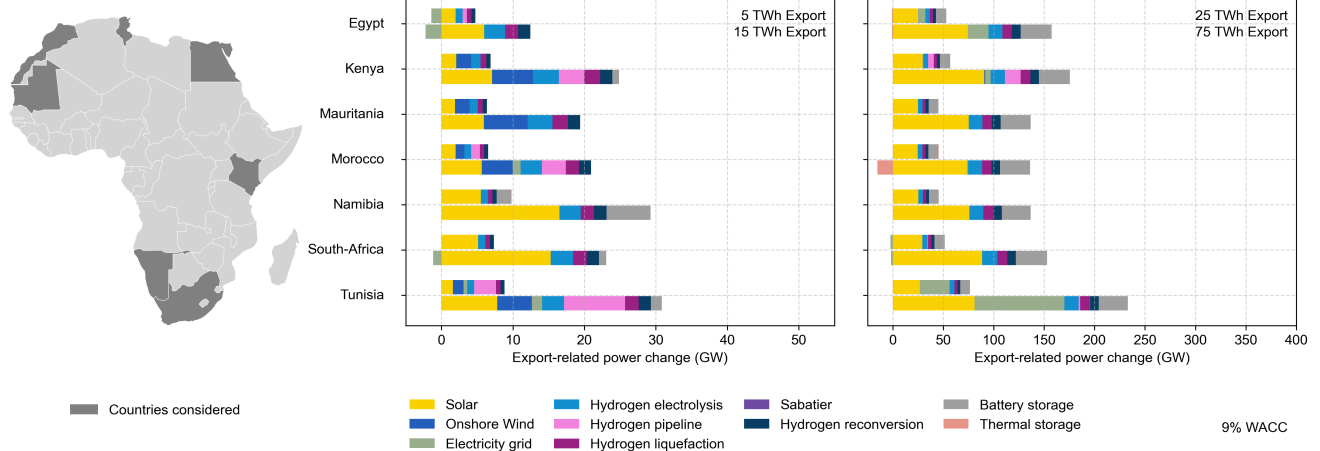

**b) Hydrogen export via ammonia**

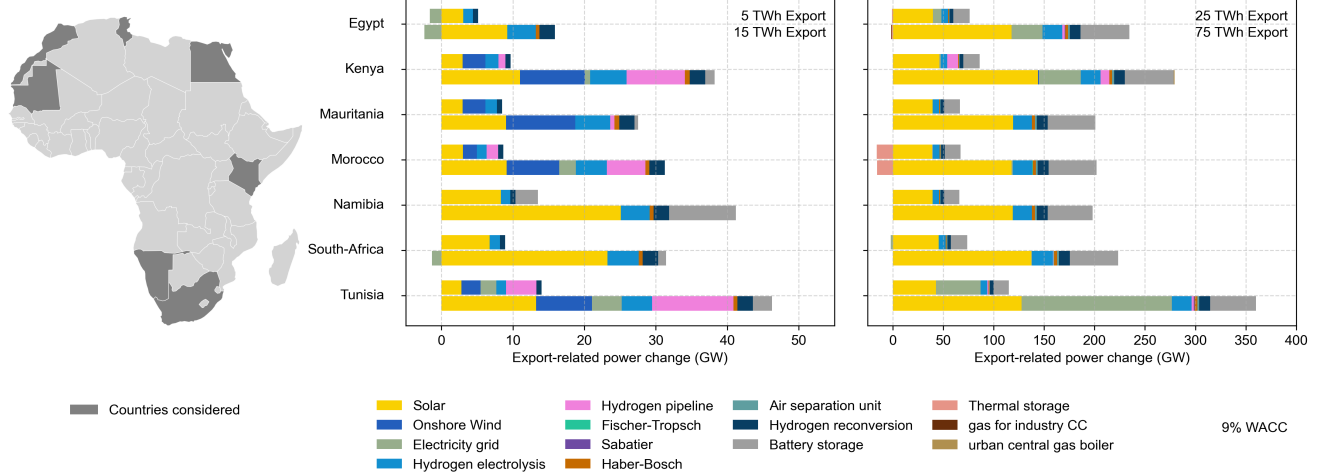

**c) Hydrogen export via methanol**

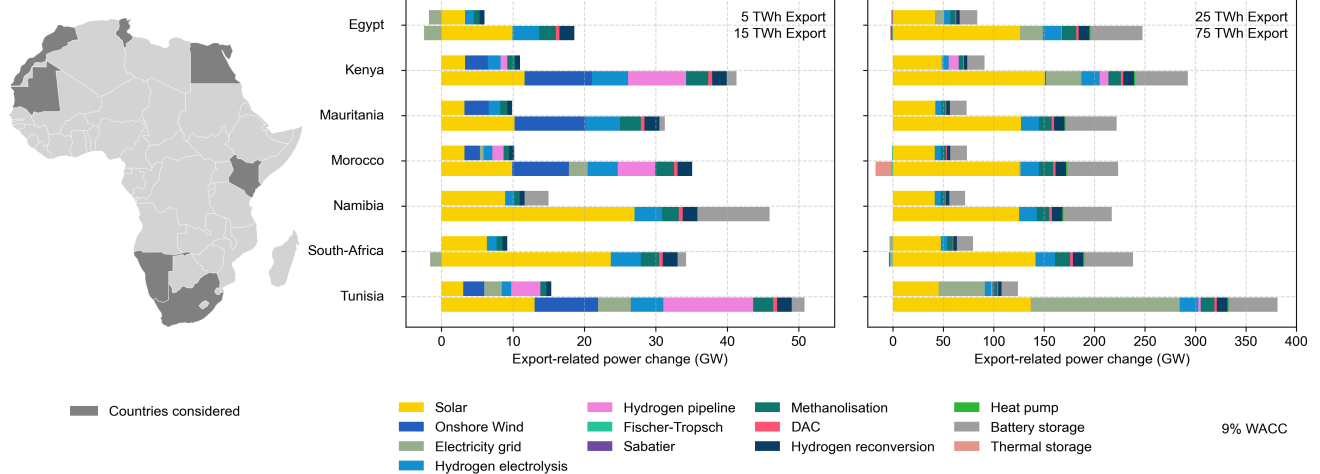

Supplementary Figure 16: Impact of hydrogen export volumes and shipping pathways on domestic power capacity in selected African countries. Liquefied hydrogen, ammonia and methanol pathways include hydrogen reconversion. Changes in power capacity by technology are shown for different export volumes in 2030 and 2050, assuming a weighted average cost of capital (WACC) of 9%. Results are reported relative to a non-export scenario. Maps indicate the African countries considered in the analysis.

**Supplementary Results: African energy systems and varying export volumes – Export-related power change, 10% WACC**

**a) Hydrogen export via liquified hydrogen**

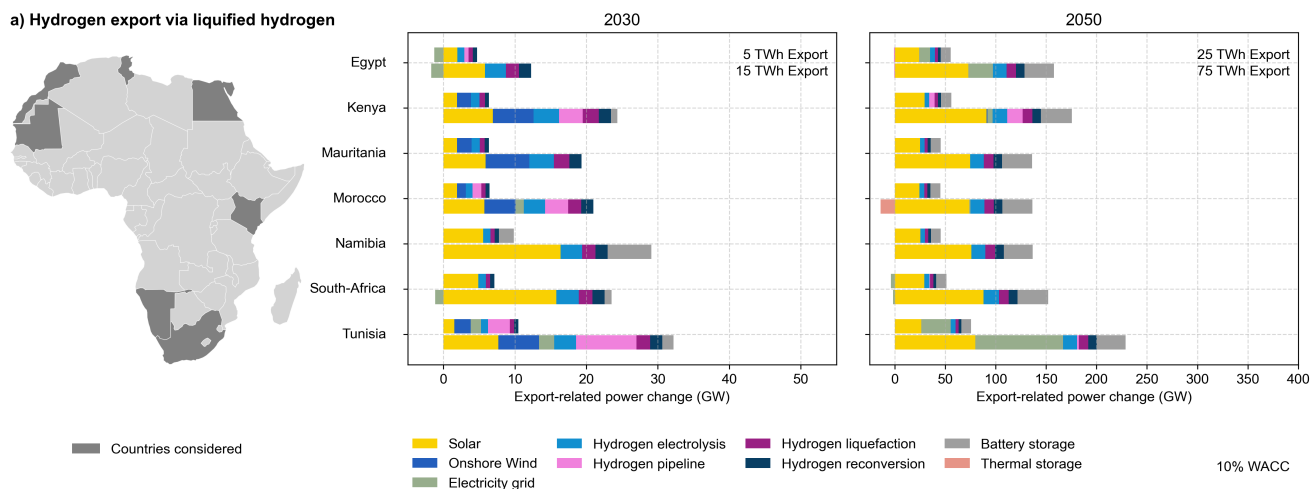

**b) Ammonia export**

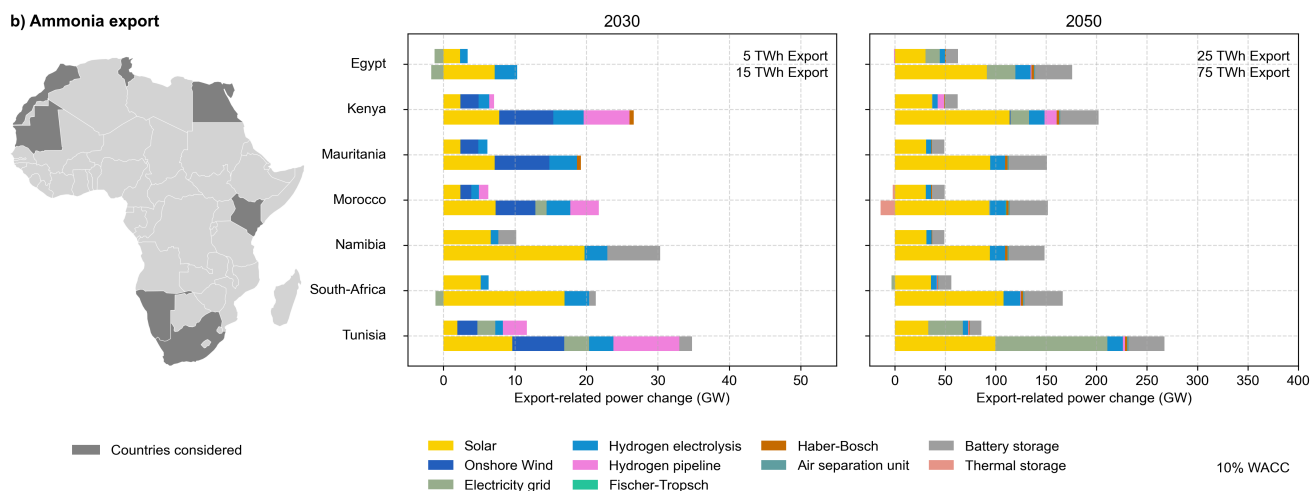

**c) Methanol export**

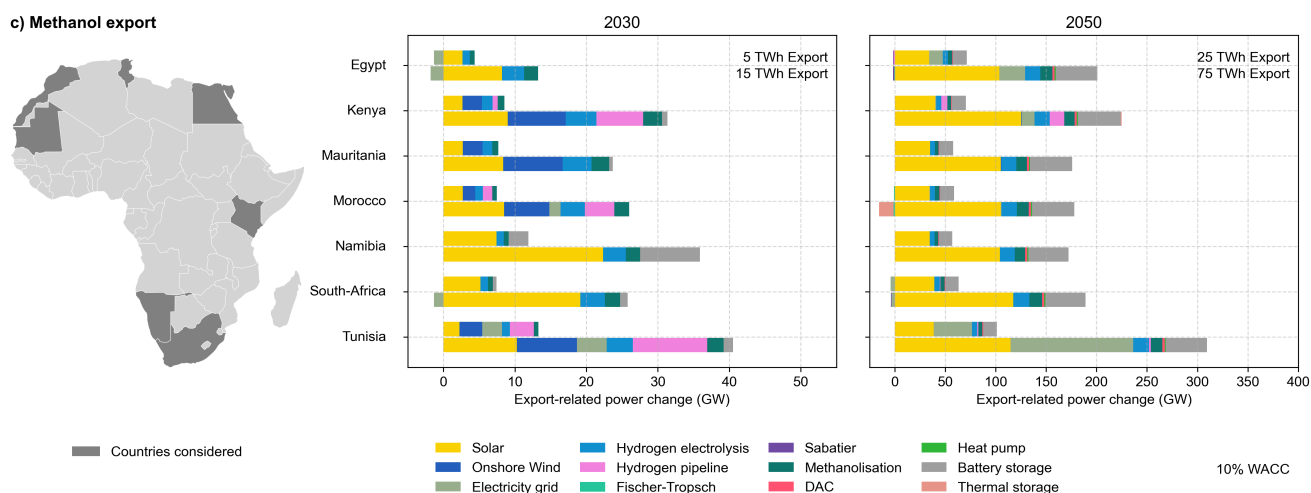

Supplementary Figure 17: Impact of hydrogen, ammonia, and methanol export volumes on domestic power capacity in selected African countries. Changes in power capacity by technology are shown for different export volumes in 2030 and 2050, assuming a weighted average cost of capital (WACC) of 10%. Results are reported relative to a non-export scenario. Maps indicate the African countries considered in the analysis.

**a) Hydrogen export via liquified hydrogen**

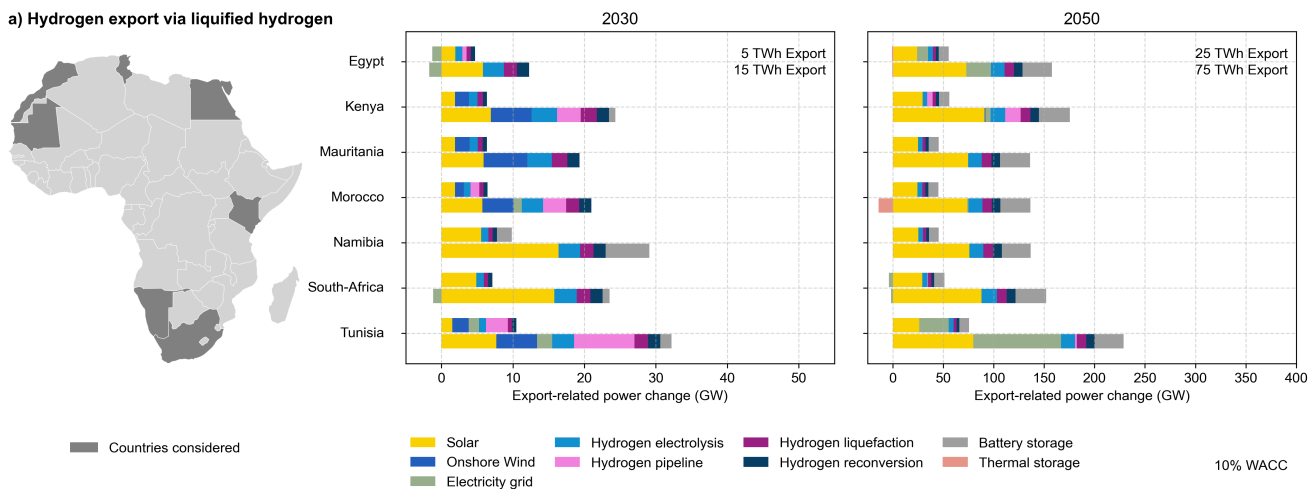

**b) Hydrogen export via ammonia**

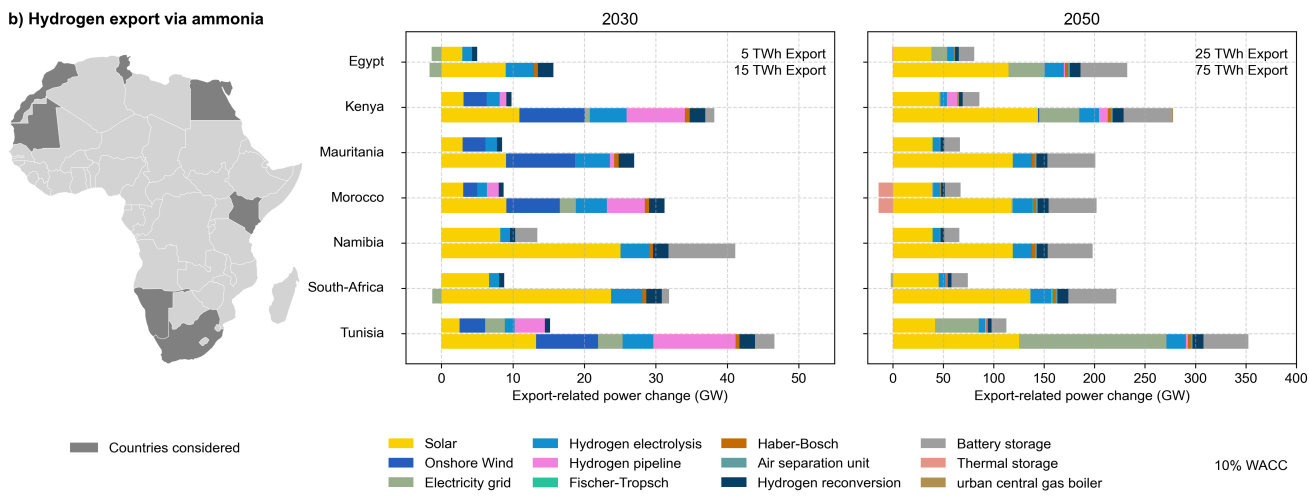

**c) Hydrogen export via methanol**

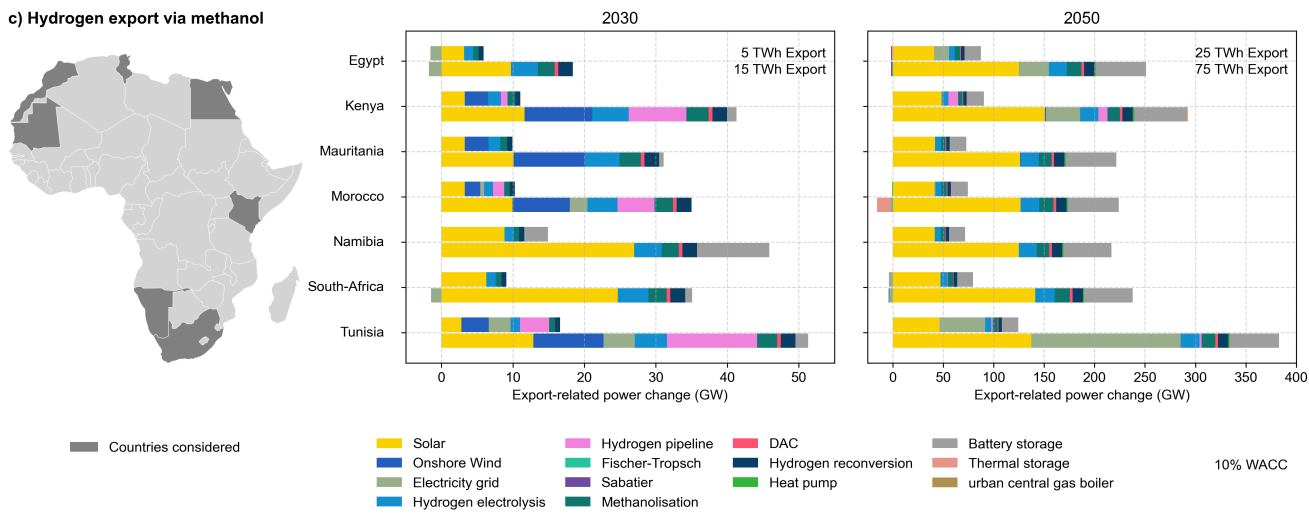

Supplementary Figure 18: Impact of hydrogen export volumes and shipping pathways on domestic power capacity in selected African countries. Liquefied hydrogen, ammonia and methanol pathways include hydrogen reconversion. Changes in power capacity by technology are shown for different export volumes in 2030 and 2050, assuming a weighted average cost of capital (WACC) of 10%. Results are reported relative to a non-export scenario. Maps indicate the African countries considered in the analysis.

**Supplementary Results: African energy systems and varying export volumes – Export-related cost change, 8% WACC**

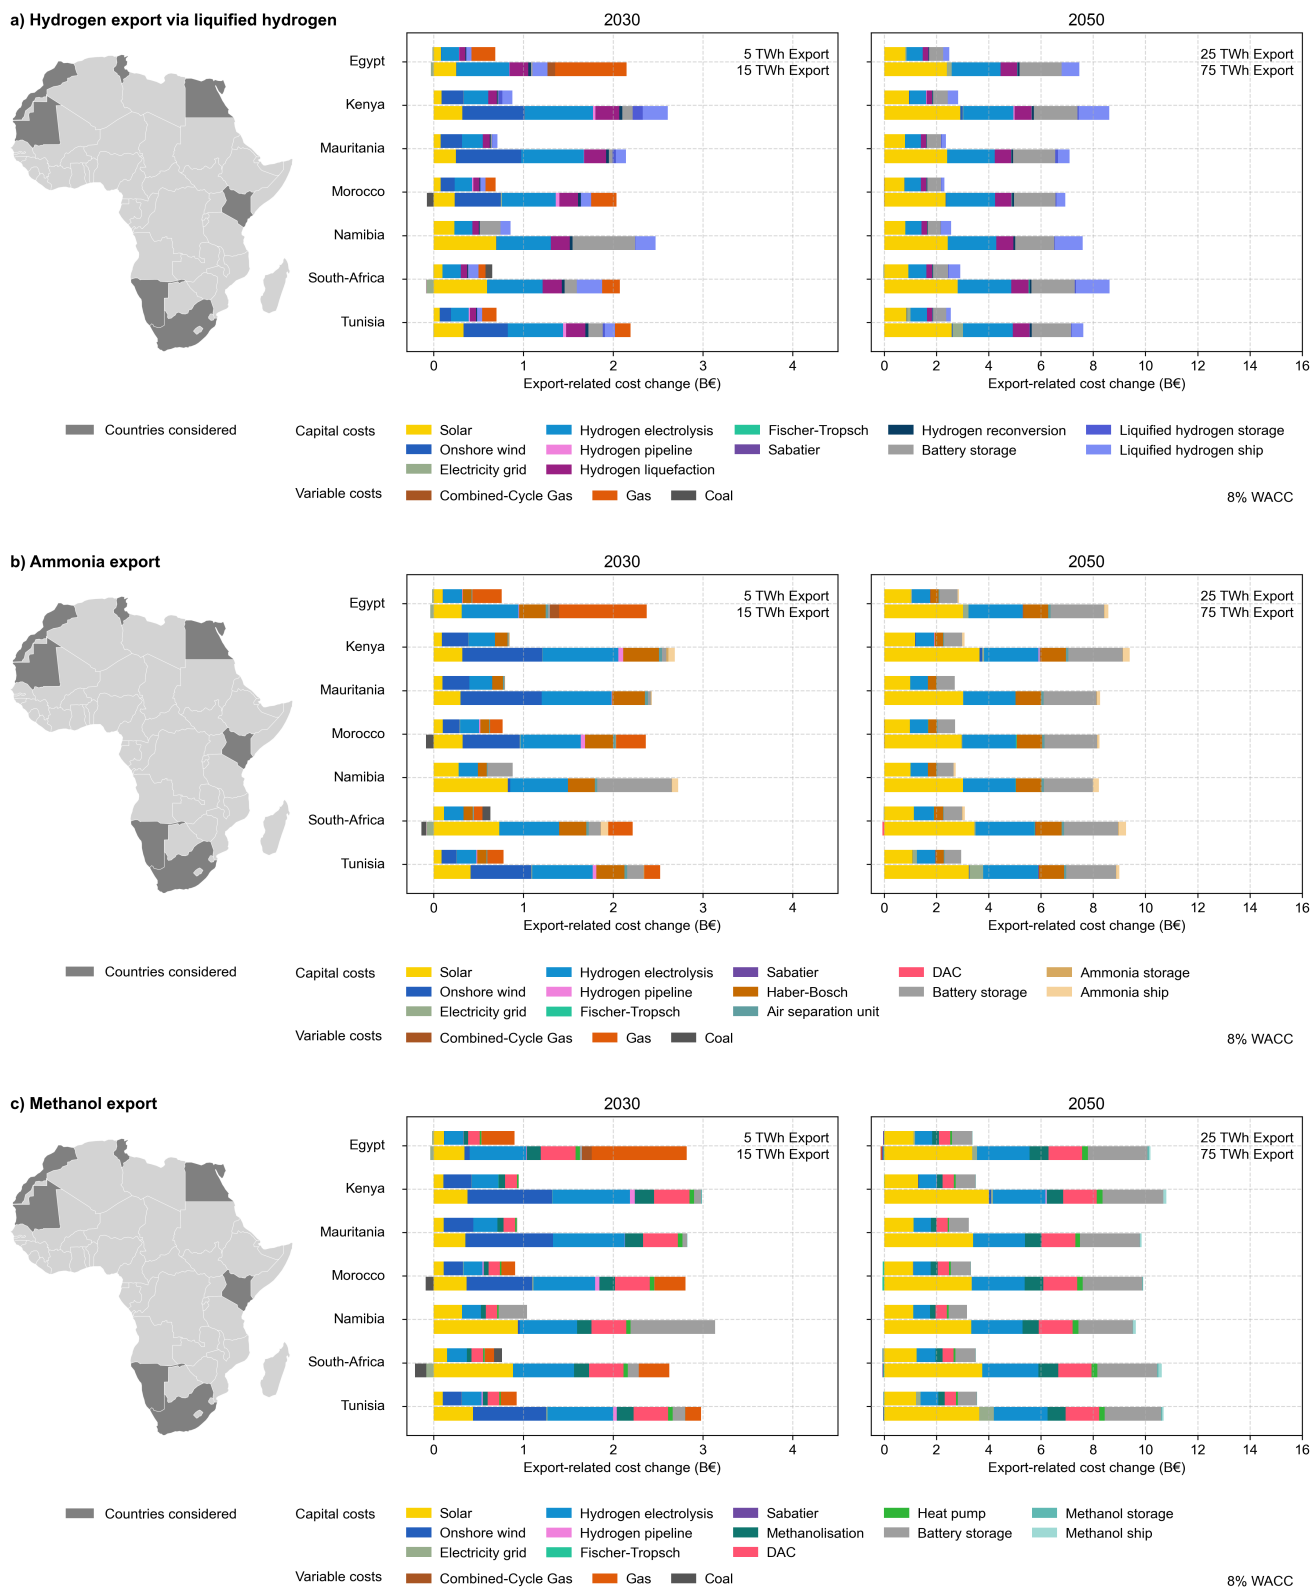

Supplementary Figure 19: Impact of hydrogen, ammonia, and methanol export volumes on additional costs in selected African countries. Changes in costs by technology are shown for different export volumes in 2030 and 2050, assuming a weighted average cost of capital (WACC) of 8%. Results are reported relative to a non-export scenario. Maps indicate the African countries considered in the analysis.

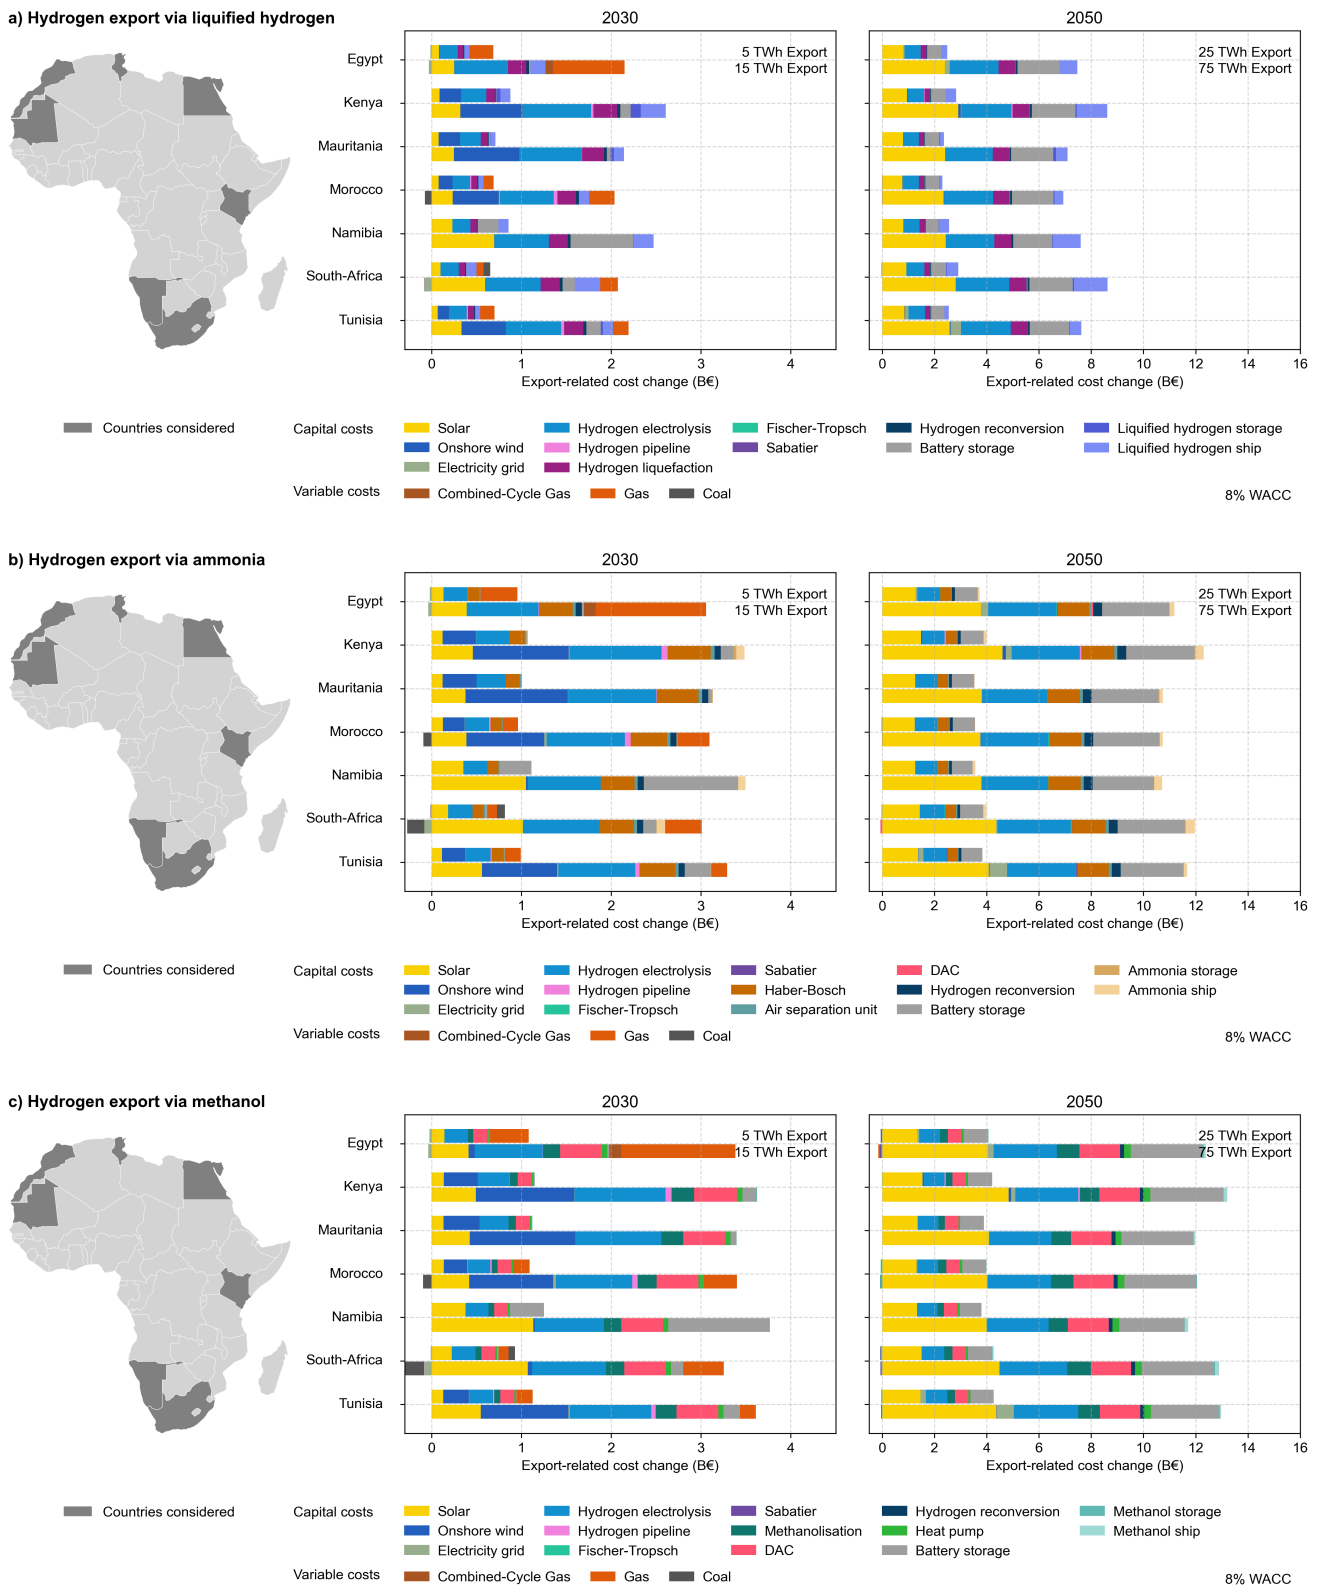

Supplementary Figure 20: Impact of hydrogen export volumes and shipping pathways on additional costs in selected African countries. Liquefied hydrogen, ammonia and methanol pathways include hydrogen reconversion. Changes in costs by technology are shown for different export volumes in 2030 and 2050, assuming a weighted average cost of capital (WACC) of 8%. Results are reported relative to a non-export scenario. Maps indicate the African countries considered in the analysis.

**Supplementary Results: African energy systems and varying export volumes – Export-related cost change, 9% WACC**

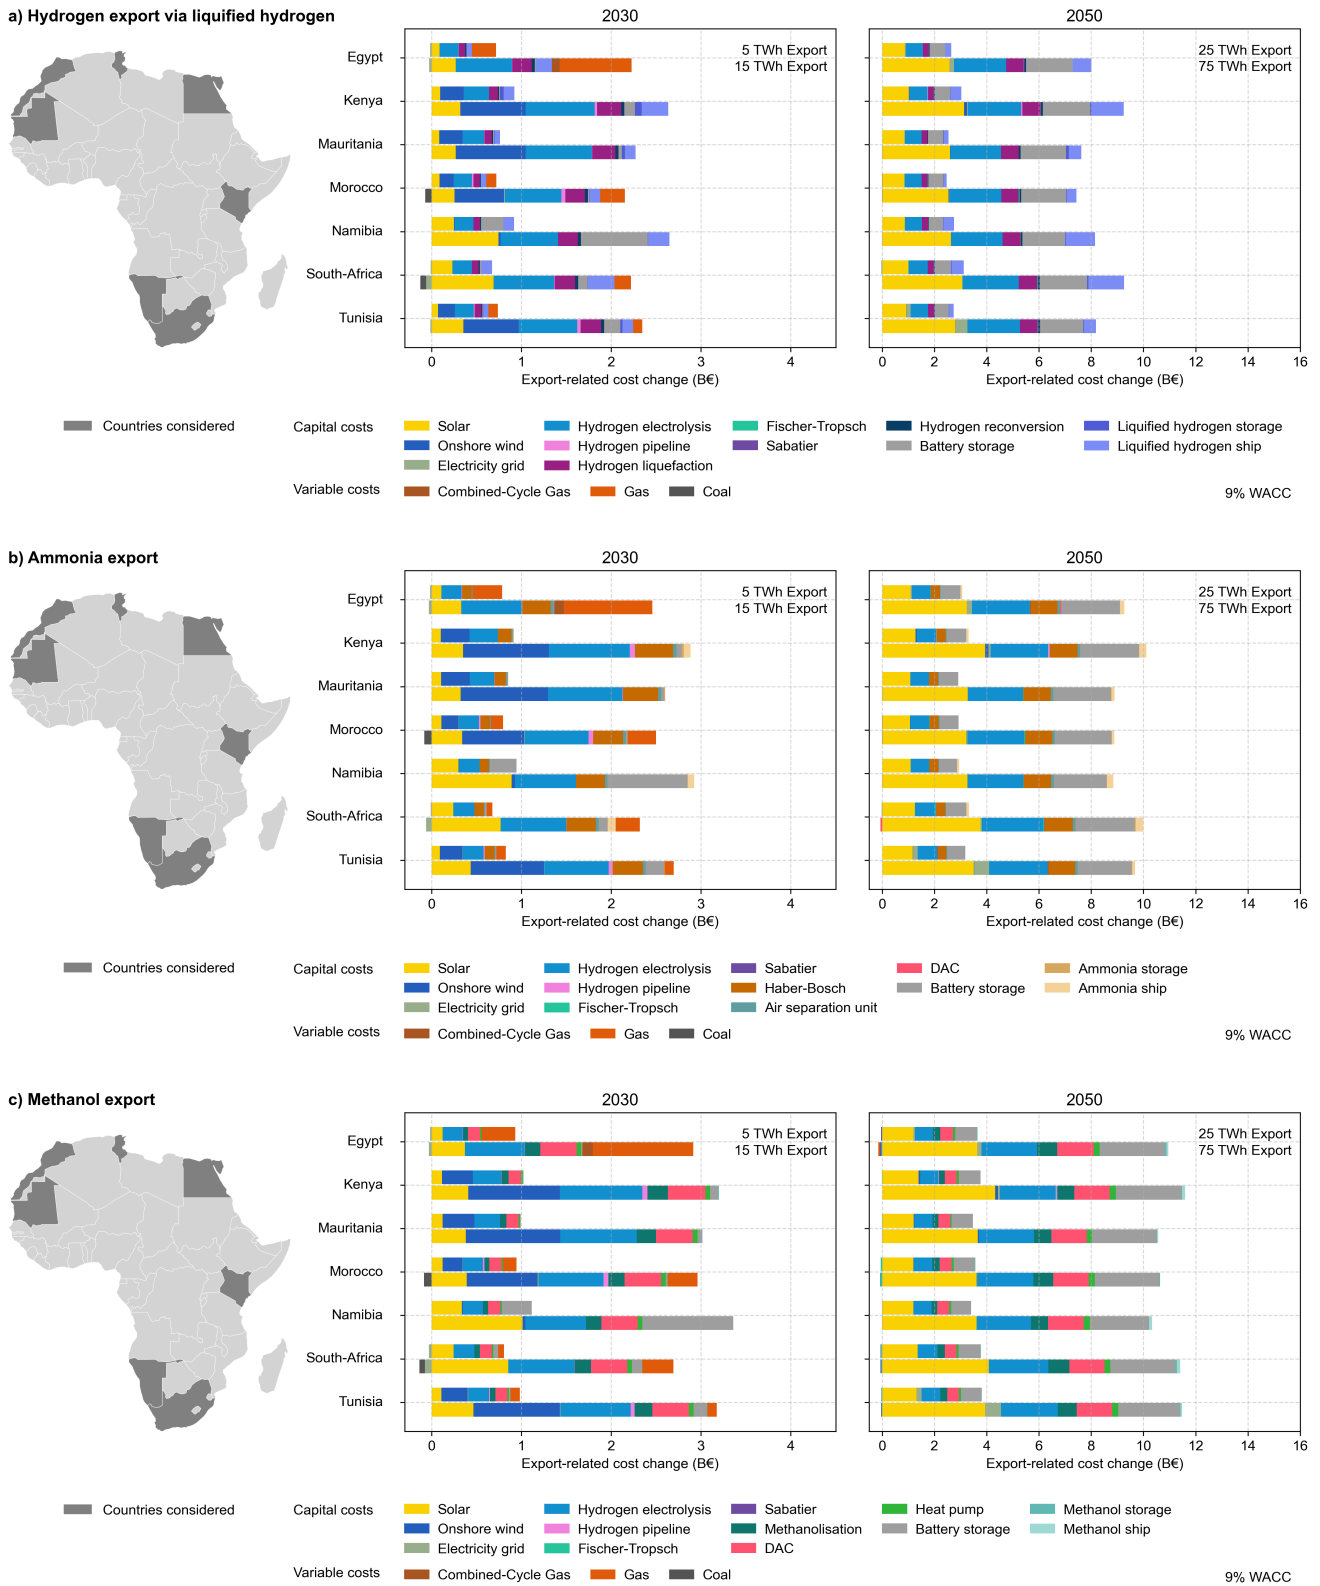

Supplementary Figure 21: Impact of hydrogen, ammonia, and methanol export volumes on additional costs in selected African countries. Changes in costs by technology are shown for different export volumes in 2030 and 2050, assuming a weighted average cost of capital (WACC) of 9%. Results are reported relative to a non-export scenario. Maps indicate the African countries considered in the analysis.

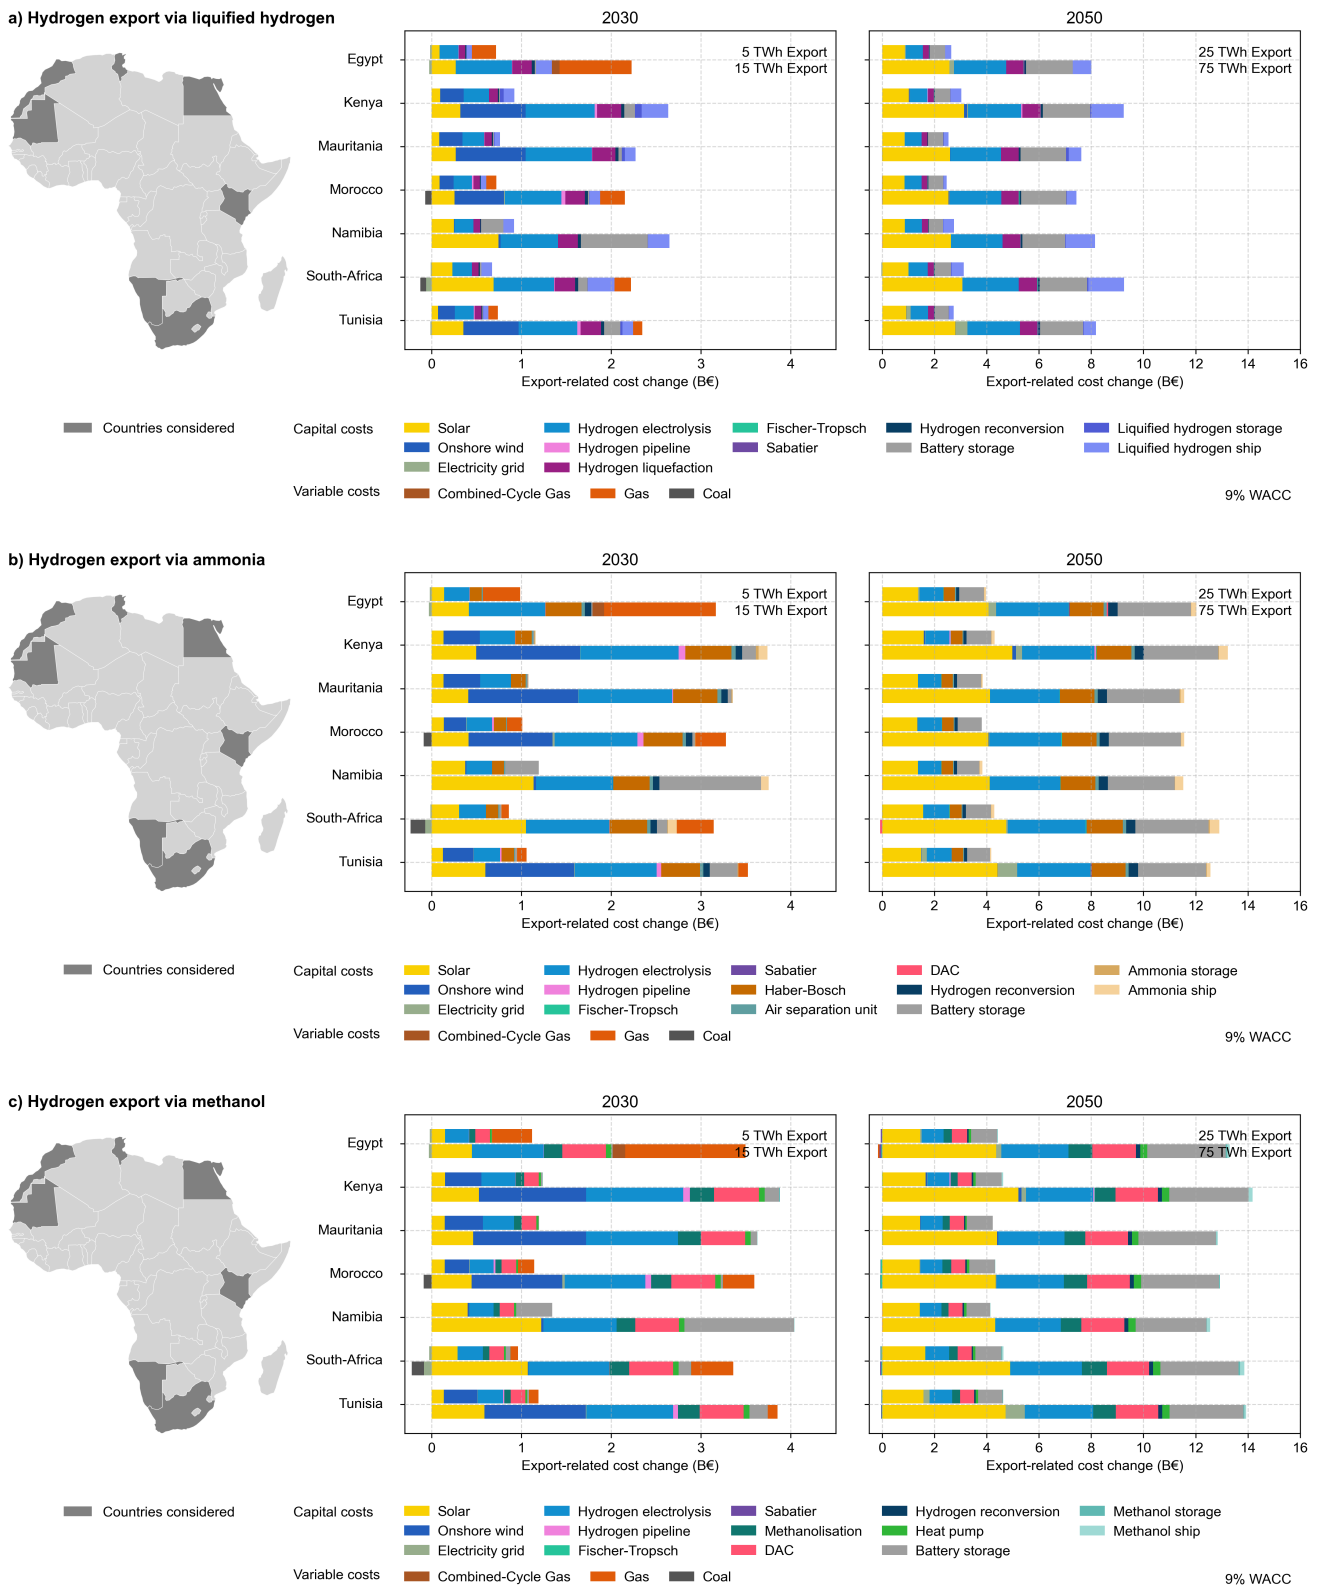

Supplementary Figure 22: Impact of hydrogen export volumes and shipping pathways on additional costs in selected African countries. Liquefied hydrogen, ammonia and methanol pathways include hydrogen reconversion. Changes in costs by technology are shown for different export volumes in 2030 and 2050, assuming a weighted average cost of capital (WACC) of 9%. Results are reported relative to a non-export scenario. Maps indicate the African countries considered in the analysis.

## Supplementary Results: African energy systems and varying export volumes – Export-related cost change, 10% WACC

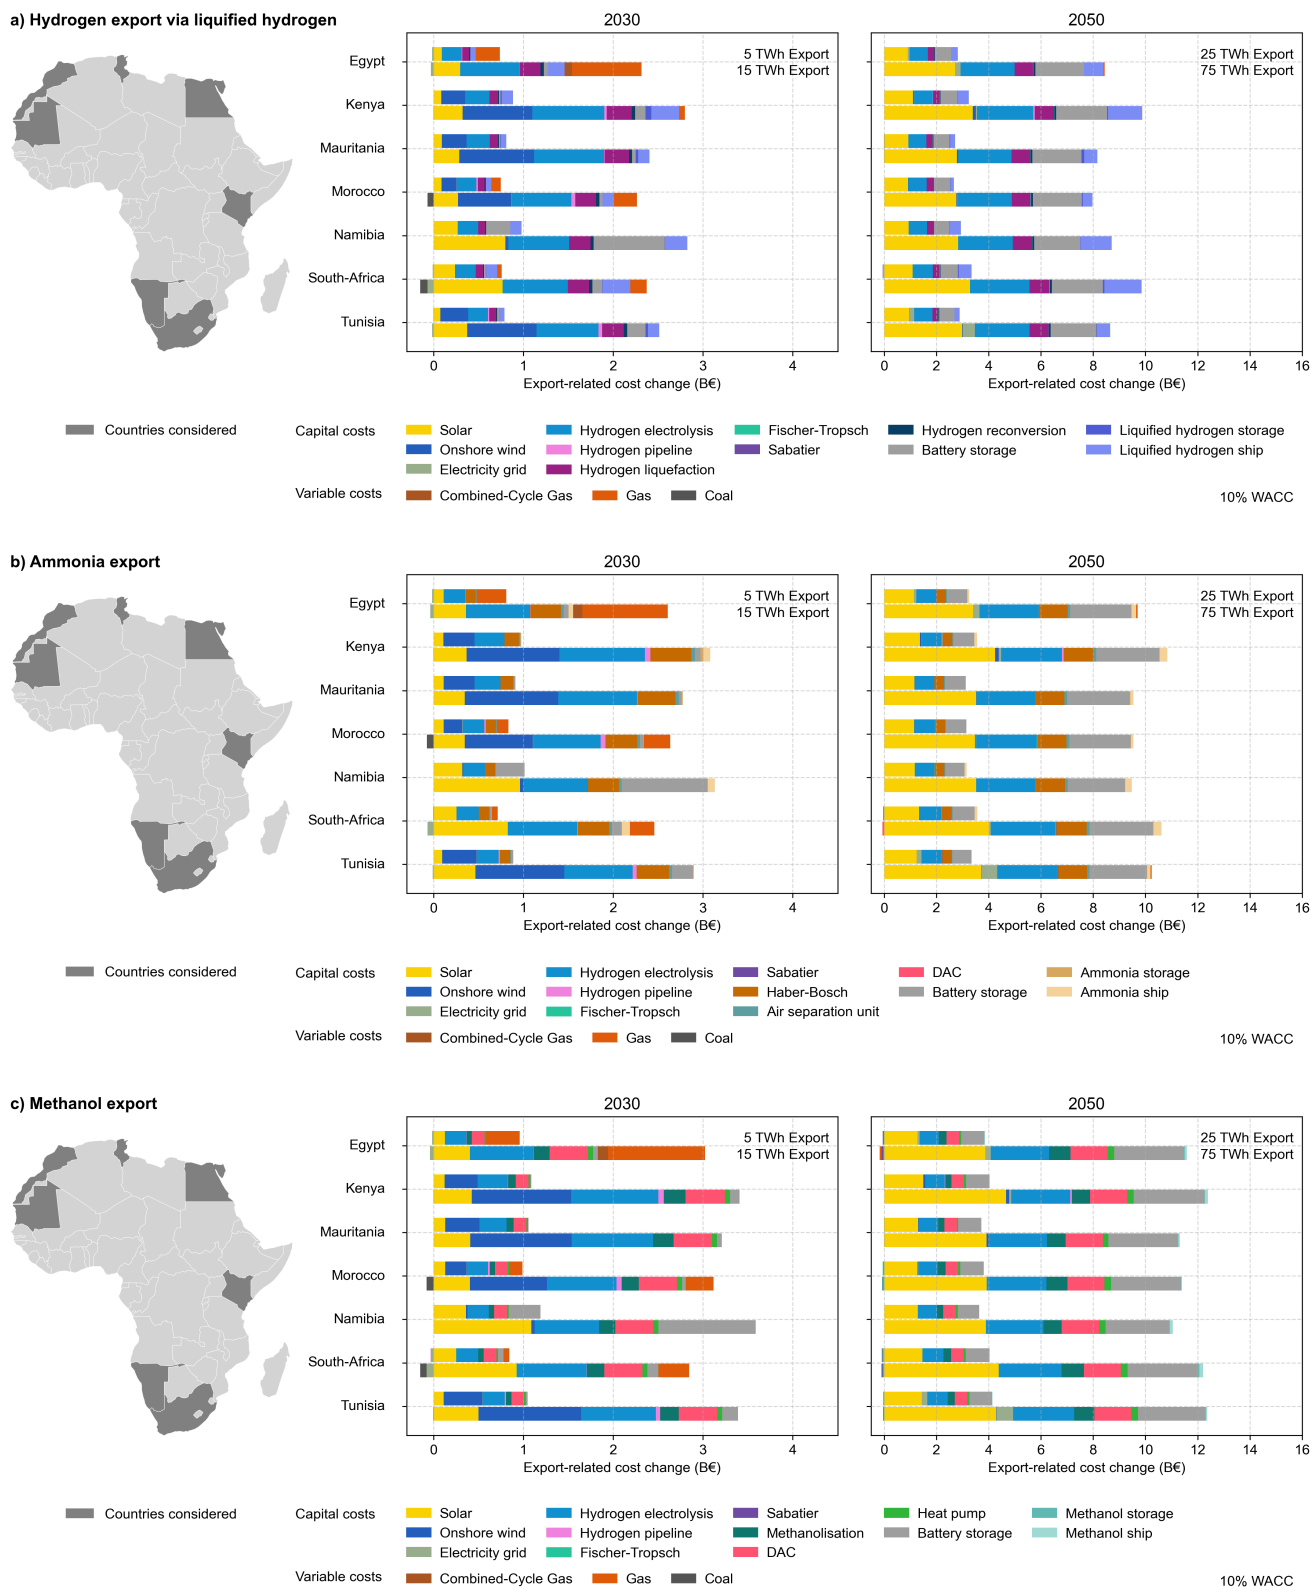

Supplementary Figure 23: Impact of hydrogen, ammonia, and methanol export volumes on additional costs in selected African countries. Changes in costs by technology are shown for different export volumes in 2030 and 2050, assuming a weighted average cost of capital (WACC) of 10%. Results are reported relative to a non-export scenario. Maps indicate the African countries considered in the analysis.

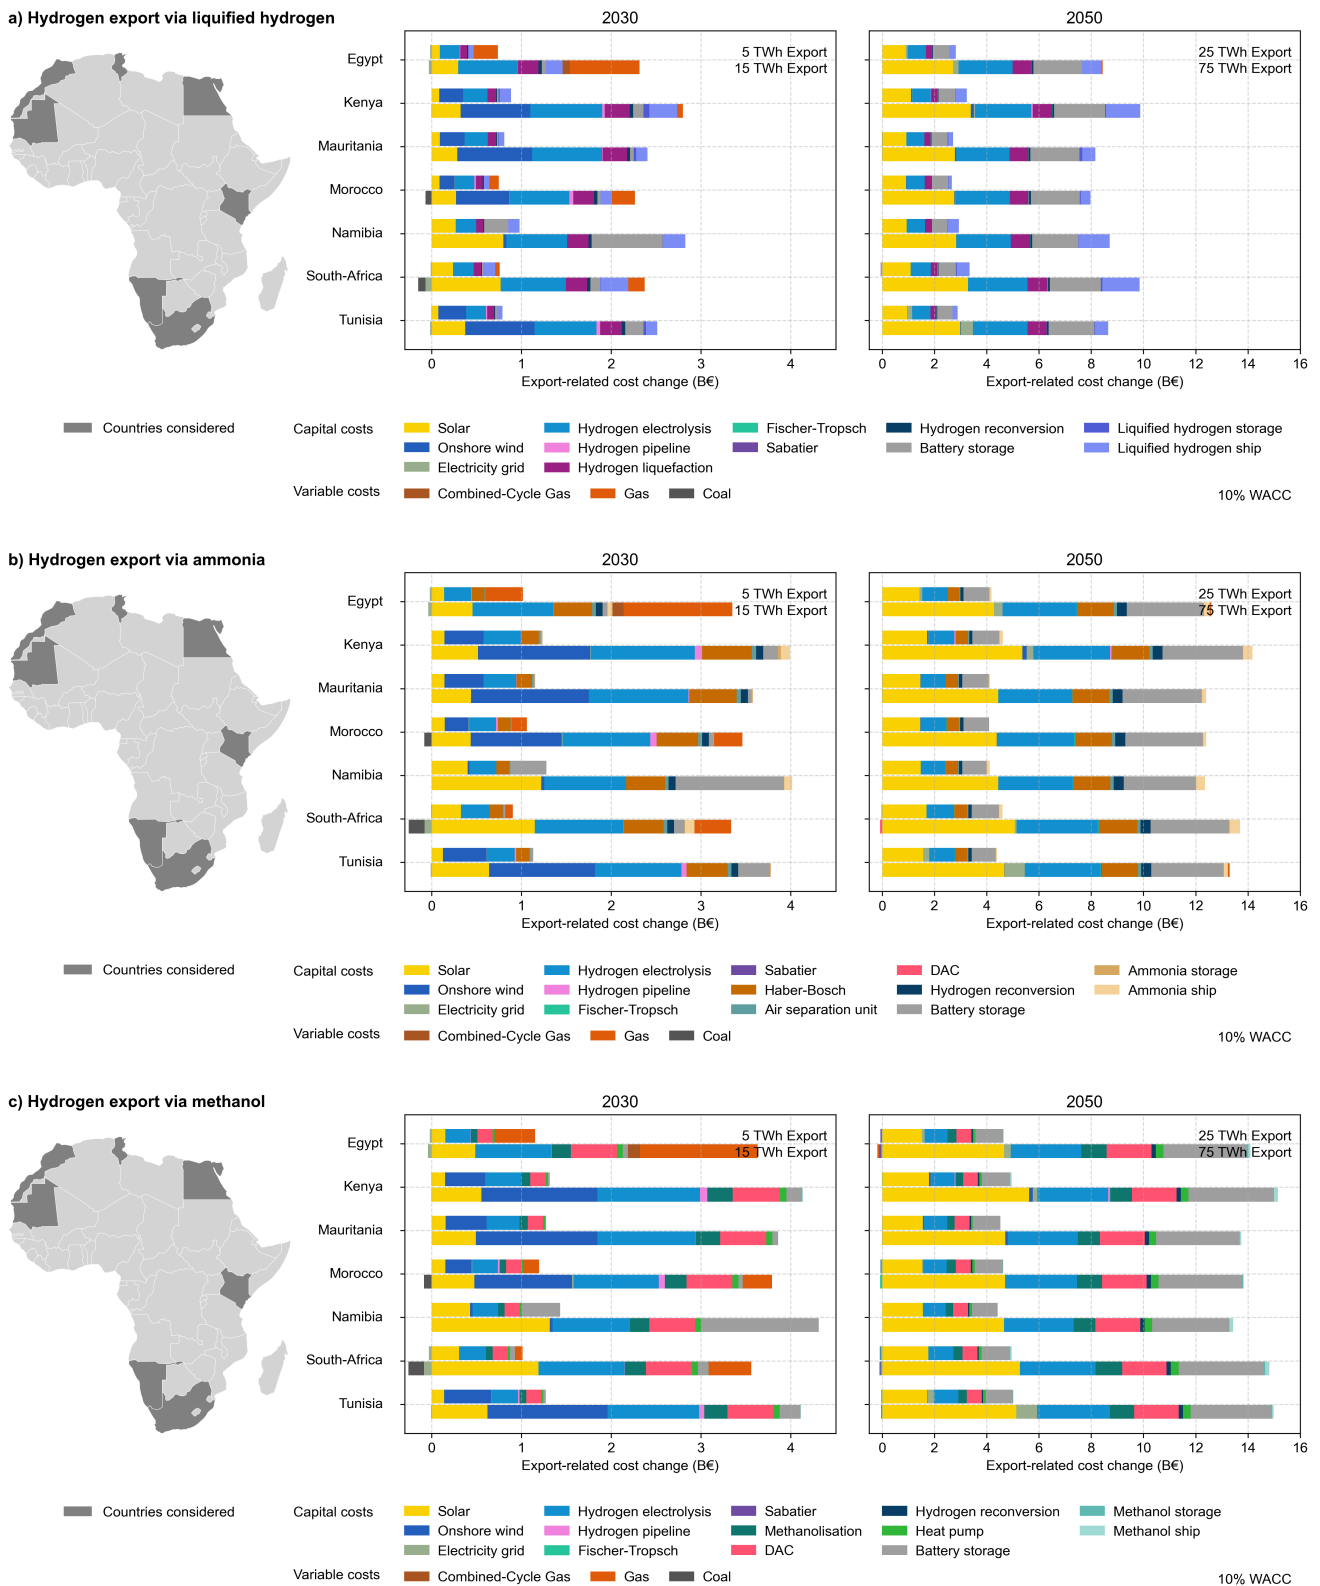

Supplementary Figure 24: Impact of hydrogen export volumes and shipping pathways on additional costs in selected African countries. Liquefied hydrogen, ammonia and methanol pathways include hydrogen reconversion. Changes in costs by technology are shown for different export volumes in 2030 and 2050, assuming a weighted average cost of capital (WACC) of 10%. Results are reported relative to a non-export scenario. Maps indicate the African countries considered in the analysis.

Supplementary Results: European-African energy exchange and the H2Global mechanism – 8% WACC

a) Liquid hydrogen export – Hydrogen usage

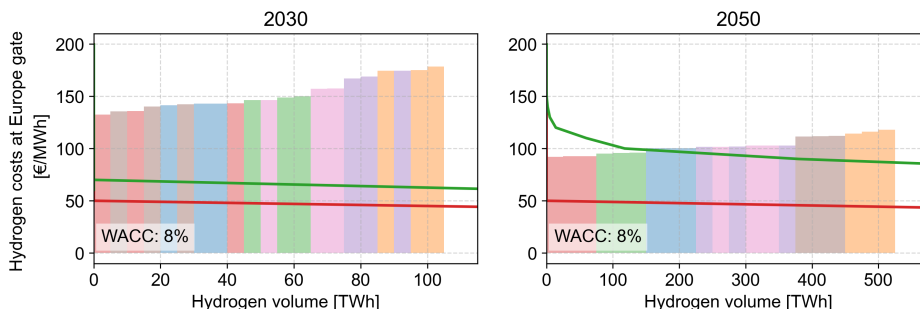

b) Ammonia export – Ammonia usage

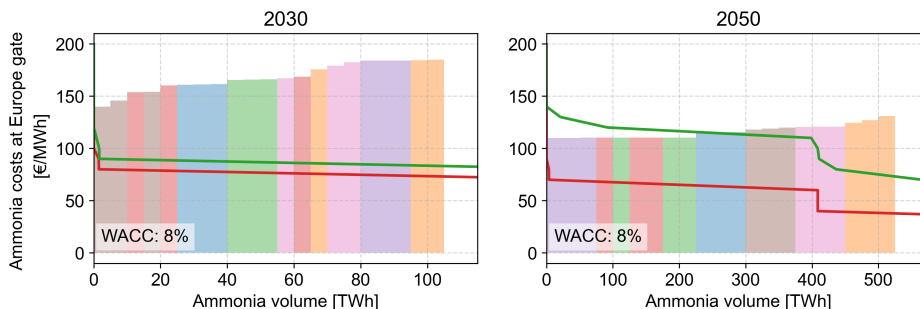

c) Methanol export – Methanol usage

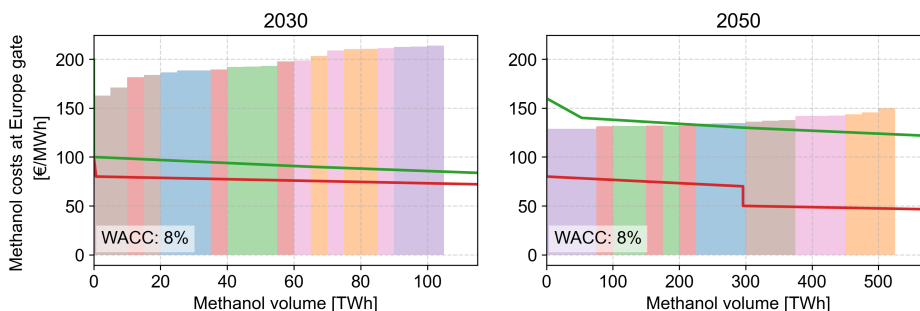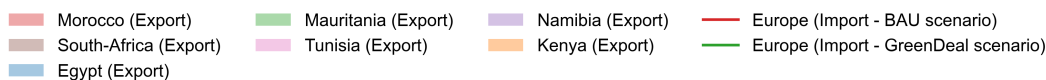

Supplementary Figure 25: European-African energy exchange of hydrogen, ammonia, and methanol. For Europe, the willingness to pay for green energy imports under the GreenDeal and Business-as-Usual (BAU) scenario is shown, assuming a weighted average cost of capital (WACC) of 7%. For African countries, the willingness to accept for green energy exports of 5, 10 and 15 TWh in 2030 and 25, 50 and 75 TWh in 2050 are shown, assuming a WACC of 8%. Comparing both results indicates funding, savings and the role of the H2Global mechanism.

**a) Liquid hydrogen export – Hydrogen usage**

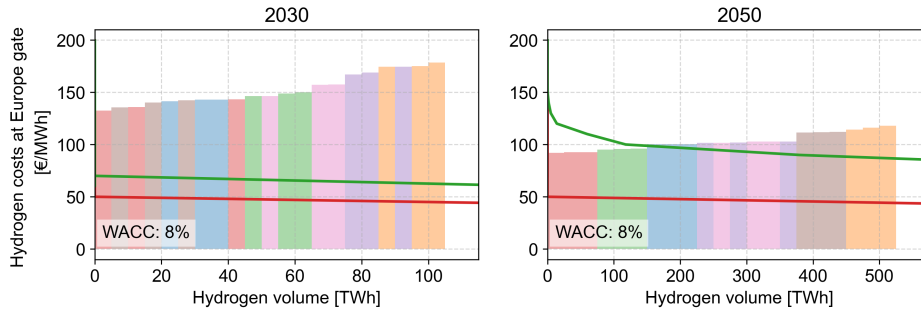

**b) Ammonia export – Hydrogen usage**

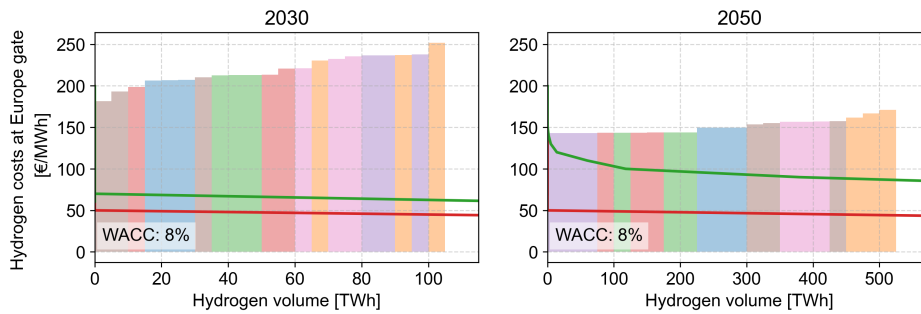

**c) Methanol export – Hydrogen usage**

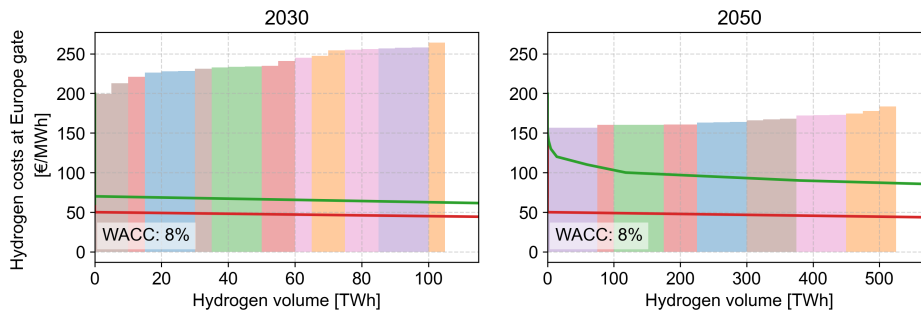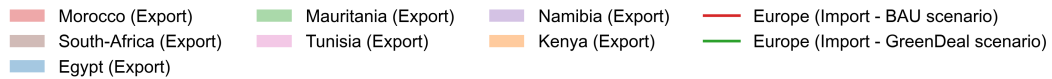

Supplementary Figure 26: European-African energy exchange of hydrogen under different shipping pathways. Liquefied hydrogen, ammonia and methanol pathways include hydrogen reconversion. For Europe, the willingness to pay for green energy imports under the GreenDeal and Business-as-Usual (BAU) scenario is shown, assuming a weighted average cost of capital (WACC) of 7%. For African countries, the willingness to accept for green energy exports of 5, 10 and 15 TWh in 2030 and 25, 50 and 75 TWh in 2050 are shown, assuming a WACC of 8%. Comparing both results indicates funding, savings and the role of the H2Global mechanism.

Supplementary Results: European-African energy exchange and the H2Global mechanism – 9% WACC

a) Liquid hydrogen export – Hydrogen usage

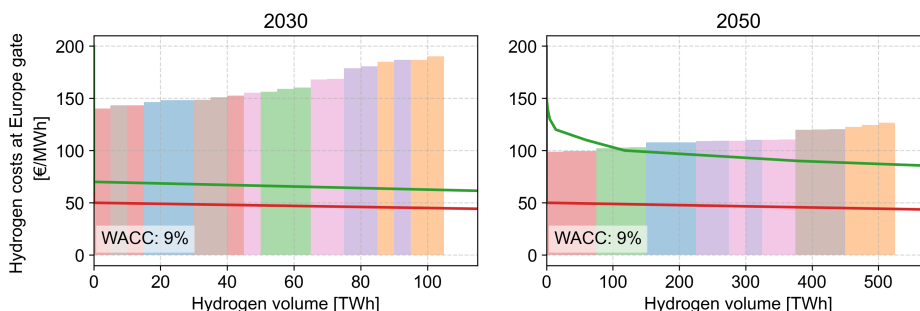

b) Ammonia export – Ammonia usage

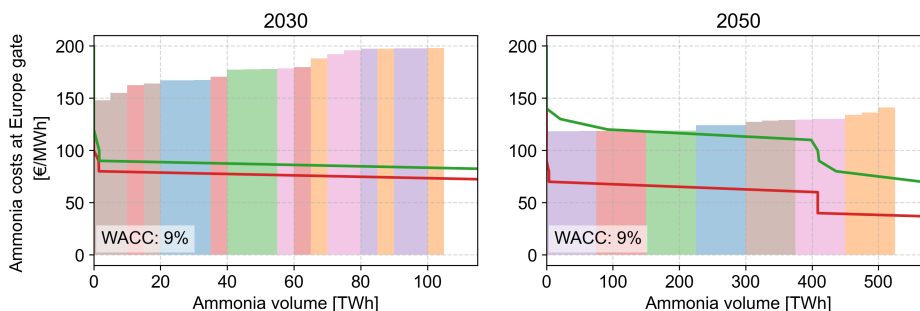

c) Methanol export – Methanol usage

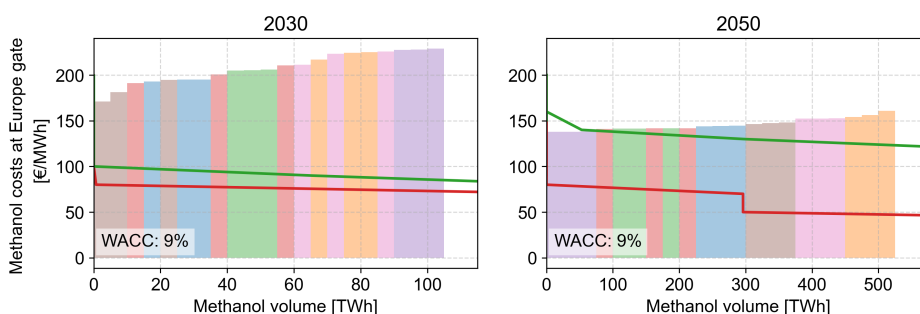

- Morocco (Export)
- Tunisia (Export)
- Namibia (Export)
- Europe (Import - BAU scenario)
- South-Africa (Export)
- Mauritania (Export)
- Kenya (Export)
- Europe (Import - GreenDeal scenario)
- Egypt (Export)

Supplementary Figure 27: European-African energy exchange of hydrogen, ammonia, and methanol. For Europe, the willingness to pay for green energy imports under the GreenDeal and Business-as-Usual scenario (BAU) is shown, assuming a weighted average cost of capital (WACC) of 7%. For African countries, the willingness to accept for green energy exports of 5, 10 and 15 TWh in 2030 and 25, 50 and 75 TWh in 2050 are shown, assuming a WACC of 9%. Comparing both results indicates funding, savings and the role of the H2Global mechanism.

**a) Liquid hydrogen export – Hydrogen usage**

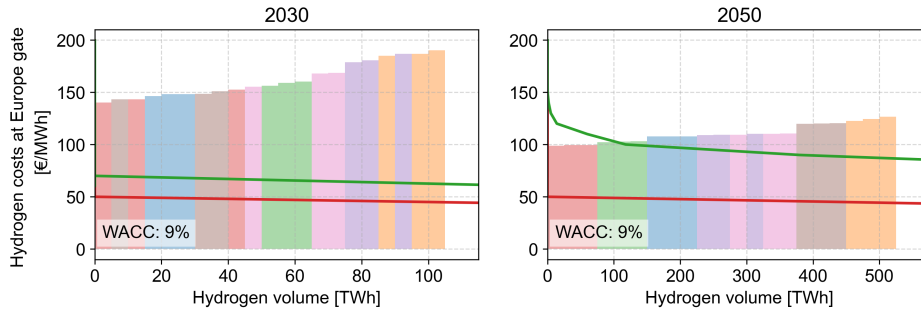

**b) Ammonia export – Hydrogen usage**

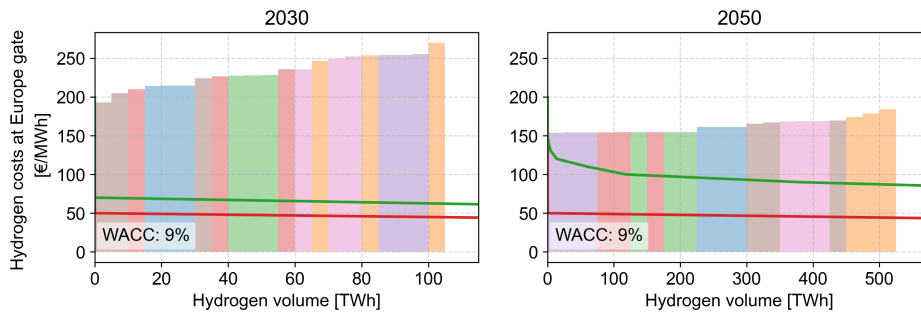

**c) Methanol export – Hydrogen usage**

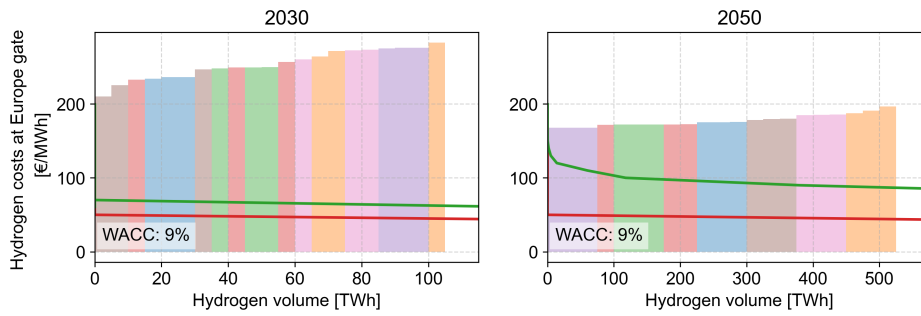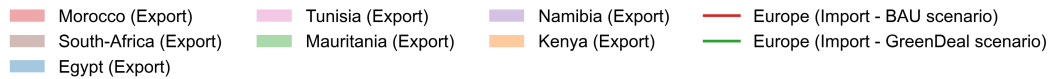

Supplementary Figure 28: European-African energy exchange of hydrogen under different shipping pathways. Liquefied hydrogen, ammonia and methanol pathways include hydrogen reconversion. For Europe, the willingness to pay for green energy imports under the GreenDeal and Business-as-Usual (BAU) scenario is shown, assuming a weighted average cost of capital (WACC) of 7%. For African countries, the willingness to accept for green energy exports of 5, 10 and 15 TWh in 2030 and 25, 50 and 75 TWh in 2050 are shown, assuming a WACC of 9%. Comparing both results indicates funding, savings and the role of the H2Global mechanism.

Supplementary Results: European-African energy exchange and the H2Global mechanism – 10% WACC

a) Liquid hydrogen export – Hydrogen usage

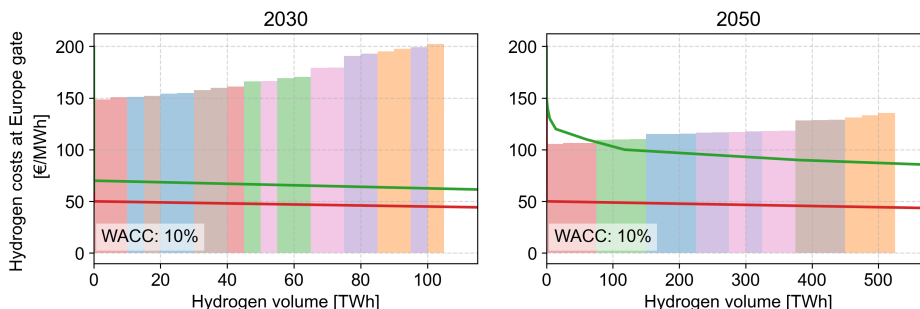

b) Ammonia export – Ammonia usage

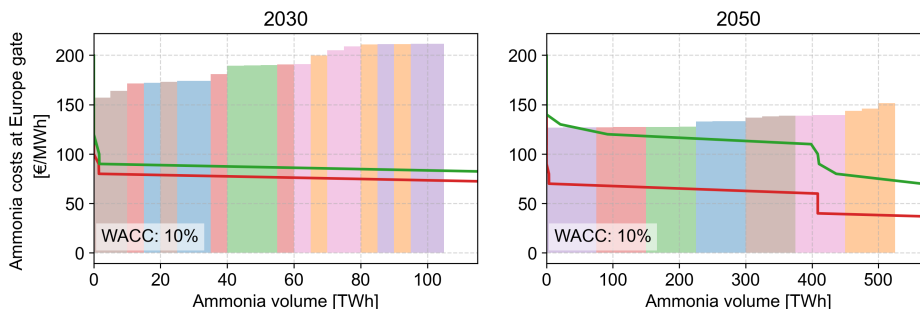

c) Methanol export – Methanol usage

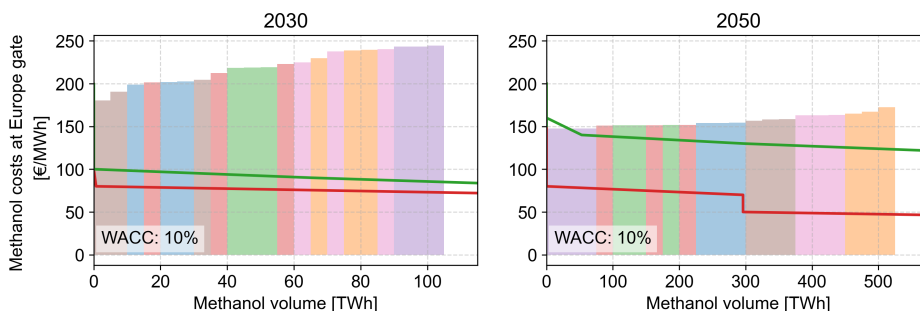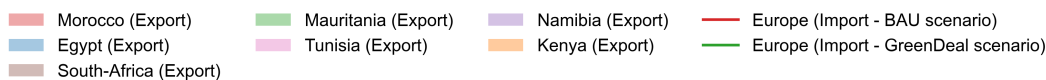

Supplementary Figure 29: European-African energy exchange of hydrogen, ammonia, and methanol. For Europe, the willingness to pay for green energy imports under the GreenDeal and Business-as-Usual (BAU) scenario is shown, assuming a weighted average cost of capital (WACC) of 7%. For African countries, the willingness to accept for green energy exports of 5, 10 and 15 TWh in 2030 and 25, 50 and 75 TWh in 2050 are shown, assuming a WACC of 10%. Comparing both results indicates funding, savings and the role of the H2Global mechanism.

**a) Liquid hydrogen export – Hydrogen usage**

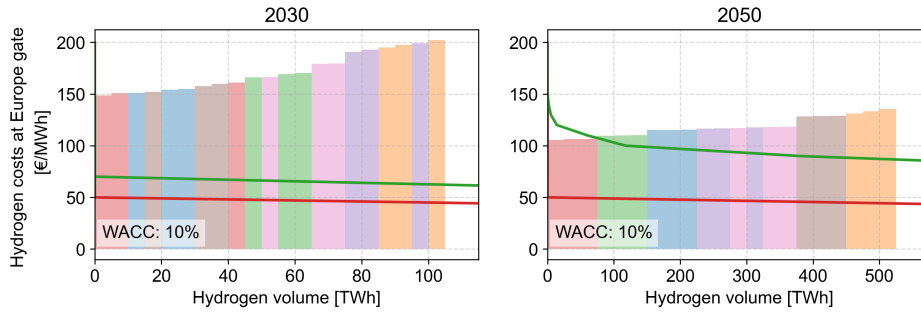

**b) Ammonia export – Hydrogen usage**

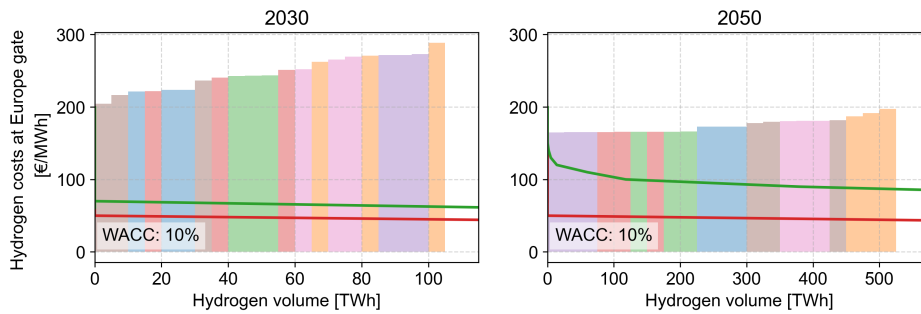

**c) Methanol export – Hydrogen usage**

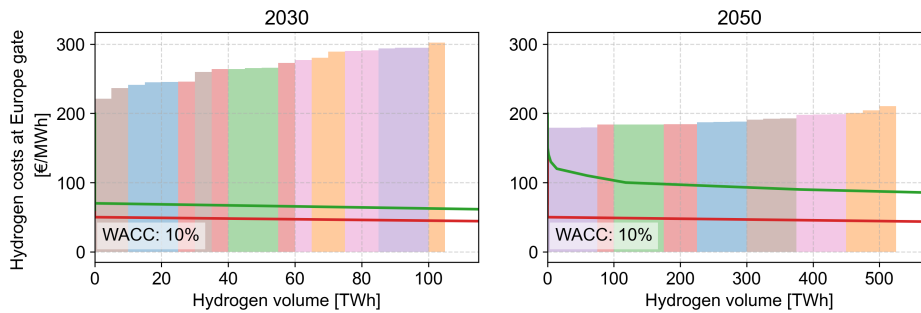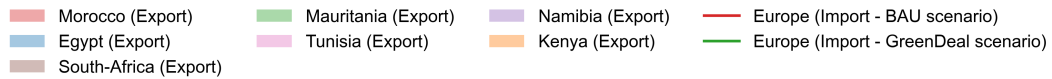

Supplementary Figure 30: European-African energy exchange of hydrogen under different shipping pathways. Liquefied hydrogen, ammonia and methanol pathways include hydrogen reconversion. For Europe, the willingness to pay for green energy imports under the GreenDeal and Business-as-Usual (BAU) scenario is shown, assuming a weighted average cost of capital (WACC) of 7%. For African countries, the willingness to accept for green energy exports of 5, 10 and 15 TWh in 2030 and 25, 50 and 75 TWh in 2050 are shown, assuming a WACC of 10%. Comparing both results indicates funding, savings and the role of the H2Global mechanism.

## Supplementary References

- [1] F. Neumann, J. Hampp, T. Brown, Green energy and steel imports reduce Europe's net-zero infrastructure needs, *Nature communications* 16 (1) (2025) 5302. doi:10.1038/s41467-025-60652-1.
- [2] H. Abdel-Khalek, L. Schumm, E. Jalbout, M. Parzen, C. Schauß, D. Fioriti, PyPSA-Earth sector-coupled: A global open-source multi-energy system model showcased for hydrogen applications in countries of the Global South, *Applied Energy* 383 (2025) 125316. doi:10.1016/j.apenergy.2025.125316.
- [3] Eurostat, Chemicals production and consumption statistics. [https://ec.europa.eu/eurostat/statistics-explained/index.php?title=Chemicals\\_production\\_and\\_consumption\\_statistics](https://ec.europa.eu/eurostat/statistics-explained/index.php?title=Chemicals_production_and_consumption_statistics)
- [4] Eurostat, Statistics on the production of manufactured goods. <https://ec.europa.eu/eurostat/databrowser/explore/all/icts?sort=category&lang=en&subtheme=prom&display=list>
